# Supplementary material for: Modeling Alveolar Soft Part Sarcoma Unveils Novel Mechanisms of Metastasis
Source: Oxford University Press journal article supplement (doi:10.1158/0008-5472.can-16-2486), 2016-12-16
Supplement: 00085472can162486-sup-171611_1_supp_3721594_bfr179.xlsx [file 00085472can162486-sup-171611_1_supp_3721594_bfr179.xlsx]

## Sheet: RT-PCR primers
Supplemental Table S1. The list of primers.
RT-PCR primers
Name	Forward	Reverse
Angptl2	TCCTTTACCTGGCACAACGG	TCGAACTCAGCCCAGTAGA
Ctsk	GGGAACGAGAAAGCCCTGAA	ATAGCCCACCACCAACACTG
Gpnmb	TGGGAGATGATGCAAGCCTG	GGGGCAGTTTCCTATTGGCT
Mdk	ACAAGTTTGAGAGCTGGGGG	TGGCTTTGGTCTTTGACTTGG
Kdelr3	ACAGTTACACGCCGATGGAG	TTCTCTGTCTGGTACCGCCT
Gapdh	TGTCGTGGAGTCTACTGGTGTCTTC	GGAGATGATGACCCTTTTGGCTC
Primers for fusion gene construction
ASPSCR1 5'	ATGGCGGCCCCGGCAGGCGGCGG
TFE3 3'	TCAGGACTCCTCTTCCATGC
MITF 3'	AACAAGTGTGCTCCGTCTC
TFEB 3'	TCACAGCACATCGCCCTCCTC
TFEC 3'	TATAATTCATCACCATCATCTG
ASPSCR1 991F	GCGGGAGCGGGATCCCCAG
MITF 965R	GGTTTCCATAAAGATCAATC
TFEB 891R	CGCTGCTGTACACATTCAGG
TFEC 560R	CTTGTTCACCGCTATACACATC
Oligonucleotide sequences encompassing artificial fusions
ASPSCR1-MITF	GCGGGAGCGGGATCCCCAGCAGGAGCAGGAGCGGGAGCGGTTGCCTGTCTCGGGAAACTTGATTGATCTTTATGGAAACC
ASPSCR1-TFEB	GCGGGAGCGGGATCCCCAGCAGGAGCAGGAGCGGGAGCGGCTACCCCTGTCCAGCAGCCACCTGAATGTGTACAGCAGCG
ASPSCR1-TFEC	GCGGGAGCGGGATCCCCAGCAGGAGCAGGAGCGGGAGCGGTTATCTGGAAGTATTTTGGATGTGTATAGCGGTGAACAAG
