# Supplementary material for: Modeling Alveolar Soft Part Sarcoma Unveils Novel Mechanisms of Metastasis
Source: Oxford University Press journal article supplement (doi:10.1158/0008-5472.can-16-2486), 2016-12-16
Supplement: 00085472can162486-sup-171611_1_supp_3721595_xfr179.xlsx [file 00085472can162486-sup-171611_1_supp_3721595_xfr179.xlsx]

## Sheet: Venn 1149_ASPS
Supplemental Table S3. Genes upregulated in mouse ASPS.
Gene Symbol	FC ([ASPS] vs [Normal])	Gene Title
Prg4	68.3216	proteoglycan 4 (megakaryocyte stimulating factor, articular superficial zone protein)
Irs4	61.8332	insulin receptor substrate 4
Slc12a8	49.1104	solute carrier family 12 (potassium/chloride transporters), member 8
Hapln1	48.2025	hyaluronan and proteoglycan link protein 1
5033421C21Rik	40.2004	RIKEN cDNA 5033421C21 gene
Mmp13	35.5936	matrix metallopeptidase 13
Tspan10	30.6374	tetraspanin 10
Pcsk1	29.6604	proprotein convertase subtilisin/kexin type 1
Tyrp1	29.0228	tyrosinase-related protein 1
Cabp1	24.0347	calcium binding protein 1
Wfdc3	23.8344	WAP four-disulfide core domain 3
Fap	20.8821	fibroblast activation protein
Twist1	20.6211	twist homolog 1 (Drosophila)
C130021I20Rik	19.347	Riken cDNA C130021I20 gene
Ap1s2	18.8728	adaptor-related protein complex 1, sigma 2 subunit
Shox2	18.5734	short stature homeobox 2
Spin2	18.305	spindlin family, member 2
Nhedc2	14.4975	Na+/H+ exchanger domain containing 2
Foxc1	13.3089	forkhead box C1
Sulf1	12.8572	sulfatase 1
Meox2	12.8363	mesenchyme homeobox 2
Trpm1	12.4051	transient receptor potential cation channel, subfamily M, member 1
Timp1	12.2684	tissue inhibitor of metalloproteinase 1
Vegfc	11.3677	vascular endothelial growth factor C
C77370	11.2873	expressed sequence C77370
Bmp7	11.0839	bone morphogenetic protein 7
Rnaset2a	10.9459	ribonuclease T2A
Capn6	9.91611	calpain 6
Col11a1	9.56996	collagen, type XI, alpha 1
Zfhx4	9.38633	zinc finger homeodomain 4
Itgbl1	9.20404	integrin, beta-like 1
Tspan6	9.11585	tetraspanin 6
Cthrc1	9.10915	collagen triple helix repeat containing 1
Cdkn3	8.83224	cyclin-dependent kinase inhibitor 3
Unc5c	8.8002	unc-5 homolog C (C. elegans)
Cpxm2	8.76222	carboxypeptidase X 2 (M14 family)
Ccl8	8.64773	chemokine (C-C motif) ligand 8
Mum1l1	8.38917	melanoma associated antigen (mutated) 1-like 1
Hmox1	8.16879	heme oxygenase (decycling) 1
Tnfrsf12a	8.14018	tumor necrosis factor receptor superfamily, member 12a
3110082D06Rik	8.06394	RIKEN cDNA 3110082D06 gene
Chrna6	8.00185	cholinergic receptor, nicotinic, alpha polypeptide 6
Trhr	7.97637	thyrotropin releasing hormone receptor
Tlr4	7.94844	toll-like receptor 4
Mkx	7.79545	mohawk homeobox
H2-Q6 /// LOC68395	7.67542	histocompatibility 2, Q region locus 6 /// histocompatibility 2, Q region locus 6-like
Bmpr1b	7.62437	bone morphogenetic protein receptor, type 1B
Ret	7.54922	ret proto-oncogene
Emp3	7.4823	epithelial membrane protein 3
Cln6	7.40282	ceroid-lipofuscinosis, neuronal 6
Steap1	7.3391	six transmembrane epithelial antigen of the prostate 1
Gsto2	7.30804	glutathione S-transferase omega 2
Pcdh17	7.23075	protocadherin 17
Hs6st2	7.09662	heparan sulfate 6-O-sulfotransferase 2
Fgf13	7.06379	fibroblast growth factor 13
Stk39	7.03465	serine/threonine kinase 39, STE20/SPS1 homolog (yeast)
Ddit3	6.64674	DNA-damage inducible transcript 3
Armcx6	6.63905	armadillo repeat containing, X-linked 6
H2-Q8	6.60858	histocompatibility 2, Q region locus 8
Cacna2d1	6.48325	calcium channel, voltage-dependent, alpha2/delta subunit 1
Bax	6.47435	BCL2-associated X protein
Galnt13	6.32865	UDP-N-acetyl-alpha-D-galactosamine:polypeptide N-acetylgalactosaminyltransferase 13
Trpv4	6.07155	transient receptor potential cation channel, subfamily V, member 4
Tmem206	6.02545	transmembrane protein 206
Bri3bp	6.01463	Bri3 binding protein
Lin7a	5.9593	lin-7 homolog A (C. elegans)
Pcsk4	5.95659	proprotein convertase subtilisin/kexin type 4
Stac2	5.94589	SH3 and cysteine rich domain 2
Fam81a	5.94566	family with sequence similarity 81, member A
Mad2l2	5.89153	MAD2 mitotic arrest deficient-like 2 (yeast)
Tmem146	5.84624	transmembrane protein 146
Cox6b2	5.80768	cytochrome c oxidase subunit VIb polypeptide 2
Thbs2	5.79786	thrombospondin 2
Bst2	5.77749	bone marrow stromal cell antigen 2
Mrs2	5.75643	MRS2 magnesium homeostasis factor homolog (S. cerevisiae)
Pcolce	5.61679	procollagen C-endopeptidase enhancer protein
Syt9	5.61365	synaptotagmin IX
Bace2	5.58357	beta-site APP-cleaving enzyme 2
Mab21l2	5.55982	mab-21-like 2 (C. elegans)
Gm8096 /// Phgdh	5.5362	3-phosphoglycerate dehydrogenase pseudogene /// 3-phosphoglycerate dehydrogenase
Igf2r	5.49665	insulin-like growth factor 2 receptor
Pdpn	5.48453	podoplanin
Nat6	5.3879	N-acetyltransferase 6
Rai14	5.37136	retinoic acid induced 14
Mab21l1	5.31408	mab-21-like 1 (C. elegans)
Scara3	5.31391	scavenger receptor class A, member 3
H2-gs10 /// H2-Q6 /// LOC68395	5.25965	MHC class I like protein GS10 /// histocompatibility 2, Q region locus 6 /// histocompatibility 2, Q region locus 6-like
Prrx1	5.20215	paired related homeobox 1
Sepw1	5.19531	selenoprotein W, muscle 1
Mtmr10	5.18824	myotubularin related protein 10
Man2b2	5.16057	mannosidase 2, alpha B2
Nid2	5.15617	nidogen 2
H2-Q7	5.08828	histocompatibility 2, Q region locus 7
Lman1	5.0847	lectin, mannose-binding, 1
Ucp2	5.06926	uncoupling protein 2 (mitochondrial, proton carrier)
Edil3	5.06049	EGF-like repeats and discoidin I-like domains 3
Gng11	5.04806	guanine nucleotide binding protein (G protein), gamma 11
Flywch2	5.03582	FLYWCH family member 2
Crispld1	4.92084	cysteine-rich secretory protein LCCL domain containing 1
Map2k5	4.8893	mitogen-activated protein kinase kinase 5
Rftn2	4.85546	raftlin family member 2
Reep5	4.84179	receptor accessory protein 5
Smpd1	4.78006	sphingomyelin phosphodiesterase 1, acid lysosomal
Hebp2	4.76898	heme binding protein 2
Rab34	4.76782	RAB34, member of RAS oncogene family
Rbm11	4.76716	RNA binding motif protein 11
C1ql3	4.76714	C1q-like 3
Gramd1a	4.76682	GRAM domain containing 1A
2610305D13Rik	4.74916	RIKEN cDNA 2610305D13 gene
Ankrd39	4.72512	ankyrin repeat domain 39
Usp18	4.72491	ubiquitin specific peptidase 18
Cdk4	4.65902	cyclin-dependent kinase 4
Ip6k3	4.6527	inositol hexaphosphate kinase 3
Comp	4.64969	cartilage oligomeric matrix protein
Bambi	4.62634	BMP and activin membrane-bound inhibitor, homolog (Xenopus laevis)
Tspan4	4.58857	tetraspanin 4
Fam185a	4.57455	family with sequence similarity 185, member A
Scn1b	4.54601	sodium channel, voltage-gated, type I, beta
Mthfr	4.50165	5,10-methylenetetrahydrofolate reductase
Sqle	4.49917	squalene epoxidase
Hfe	4.47888	hemochromatosis
Pcsk6	4.47421	proprotein convertase subtilisin/kexin type 6
Rps25	4.47154	ribosomal protein S25
Pparg	4.46495	peroxisome proliferator activated receptor gamma
Nt5dc2	4.45978	5'-nucleotidase domain containing 2
9630010G10Rik	4.45177	RIKEN cDNA 9630010G10 gene
BC060267	4.4326	cDNA sequence BC060267
Kcne3	4.43154	potassium voltage-gated channel, Isk-related subfamily, gene 3
Rps3	4.41648	ribosomal protein S3
LOC100040377	4.39831	hypothetical protein LOC100040377
Pthlh	4.38592	parathyroid hormone-like peptide
Col8a1	4.34678	collagen, type VIII, alpha 1
Greb1	4.32481	gene regulated by estrogen in breast cancer protein
Dci	4.27481	dodecenoyl-Coenzyme A delta isomerase (3,2 trans-enoyl-Coenyme A isomerase)
Hexa	4.26514	hexosaminidase A
Lonrf3	4.26411	LON peptidase N-terminal domain and ring finger 3
Armcx3	4.26067	armadillo repeat containing, X-linked 3
Hgsnat	4.26009	Heparan-alpha-glucosaminide N-acetyltransferase
Col12a1	4.23378	collagen, type XII, alpha 1
Sars	4.19667	seryl-aminoacyl-tRNA synthetase
Gpx7	4.19477	glutathione peroxidase 7
Fkbp7	4.1773	FK506 binding protein 7
Ccl12	4.16244	chemokine (C-C motif) ligand 12
Stx12	4.13716	syntaxin 12
Tmem134	4.1195	transmembrane protein 134
Hoxc6	4.11555	homeobox C6
Aldh1l2	4.11476	aldehyde dehydrogenase 1 family, member L2
Pltp	4.11203	phospholipid transfer protein
Ralgds	4.09053	ral guanine nucleotide dissociation stimulator
Maged2	4.08646	melanoma antigen, family D, 2
Mrc2	4.06813	mannose receptor, C type 2
9630033F20Rik	4.02646	RIKEN cDNA 9630033F20 gene
Tlcd1	4.00408	TLC domain containing 1
BC018465	3.98934	cDNA sequence BC018465
Vat1	3.97567	Vesicle amine transport protein 1 homolog (T californica)
Aga	3.97476	aspartylglucosaminidase
Nfe2l2	3.97352	nuclear factor, erythroid derived 2, like 2
2010320O07Rik	3.97273	RIKEN cDNA 2010320O07 gene
Sox4	3.9723	SRY-box containing gene 4
Cybrd1	3.92746	cytochrome b reductase 1
2410006H16Rik	3.92346	RIKEN cDNA 2410006H16 gene
Bmyc	3.91787	brain expressed myelocytomatosis oncogene
LOC100503380 /// Matr3	3.91754	hypothetical LOC100503380 /// matrin 3
LOC100505264 /// Me2	3.91335	NAD-dependent malic enzyme, mitochondrial-like /// malic enzyme 2, NAD(+)-dependent, mitochondrial
Tmie	3.91303	transmembrane inner ear
Fam64a	3.90337	family with sequence similarity 64, member A
B930041F14Rik	3.89061	RIKEN cDNA B930041F14 gene
Ddhd2	3.88385	DDHD domain containing 2
Sdsl	3.87716	serine dehydratase-like
Alkbh2	3.87675	alkB, alkylation repair homolog 2 (E. coli)
Fzd8	3.86417	frizzled homolog 8 (Drosophila)
Mfsd8	3.8612	major facilitator superfamily domain containing 8
Prpsap1	3.84601	phosphoribosyl pyrophosphate synthetase-associated protein 1
Upp1	3.82668	uridine phosphorylase 1
Zfp711	3.81515	zinc finger protein 711
H2-M3	3.80013	histocompatibility 2, M region locus 3
Fstl1	3.79994	follistatin-like 1
Gulp1	3.79792	GULP, engulfment adaptor PTB domain containing 1
Hspbp1	3.78026	HSPA (heat shock 70kDa) binding protein, cytoplasmic cochaperone 1
Cisd3	3.76292	CDGSH iron sulfur domain 3
0610010B08Rik /// Gm14295 /// LOC627901	3.75377	RIKEN cDNA 0610010B08 gene /// predicted gene 14295 /// similar to zinc finger protein 14
Mtrr	3.75258	5-methyltetrahydrofolate-homocysteine methyltransferase reductase
Slit2	3.75062	slit homolog 2 (Drosophila)
Dpysl3	3.73417	dihydropyrimidinase-like 3
Bche	3.73025	butyrylcholinesterase
Lrrc16b	3.72835	leucine rich repeat containing 16B
Bet1	3.72289	blocked early in transport 1 homolog (S. cerevisiae)
Ndufb8	3.72273	NADH dehydrogenase (ubiquinone) 1 beta subcomplex 8
Homer3	3.71717	homer homolog 3 (Drosophila)
A930024E05Rik	3.71671	RIKEN cDNA A930024E05 gene
Slc25a19	3.71144	solute carrier family 25 (mitochondrial thiamine pyrophosphate carrier), member 19
Acsl4	3.70045	acyl-CoA synthetase long-chain family member 4
Chic1	3.69722	cysteine-rich hydrophobic domain 1
Srxn1	3.69304	sulfiredoxin 1 homolog (S. cerevisiae)
Prrg4	3.68355	proline rich Gla (G-carboxyglutamic acid) 4 (transmembrane)
Lmx1b	3.66101	LIM homeobox transcription factor 1 beta
2310010G23Rik	3.65492	RIKEN cDNA 2310010G23 gene
Dap	3.65251	death-associated protein
Myrip	3.65113	myosin VIIA and Rab interacting protein
Pdgfa	3.65067	platelet derived growth factor, alpha
Gnl3	3.64931	guanine nucleotide binding protein-like 3 (nucleolar)
Rmnd1	3.64445	required for meiotic nuclear division 1 homolog (S. cerevisiae)
Zfp521	3.63485	zinc finger protein 521
Alg10b	3.62329	asparagine-linked glycosylation 10 homolog B (yeast, alpha-1,2-glucosyltransferase)
Hgf	3.61291	hepatocyte growth factor
Solh	3.61172	small optic lobes homolog (Drosophila)
Ttll12	3.60454	tubulin tyrosine ligase-like family, member 12
Kctd8	3.59913	potassium channel tetramerisation domain containing 8
Srm	3.57657	spermidine synthase
Hmga1 /// Hmga1-rs1	3.56514	high mobility group AT-hook 1 /// high mobility group AT-hook I, related sequence 1
Slc12a7	3.5639	solute carrier family 12, member 7
Galc	3.56194	galactosylceramidase
Coq7	3.55641	demethyl-Q 7
1110014N23Rik	3.5541	RIKEN cDNA 1110014N23 gene
D630039A03Rik	3.55146	RIKEN cDNA D630039A03 gene
Serpine1	3.53038	serine (or cysteine) peptidase inhibitor, clade E, member 1
Pspn	3.52348	persephin
Mrgpre	3.51535	MAS-related GPR, member E
Fam122b	3.5149	family with sequence similarity 122, member B
Paxip1	3.50569	PAX interacting (with transcription-activation domain) protein 1
Ccdc158	3.49944	coiled-coil domain containing 158
Lix1l	3.49855	Lix1-like
Gpx8	3.49339	glutathione peroxidase 8 (putative)
1500012F01Rik	3.49124	RIKEN cDNA 1500012F01 gene
Rad50	3.48958	RAD50 homolog (S. cerevisiae)
Rsph4a	3.47621	radial spoke head 4 homolog A (Chlamydomonas)
Med22	3.47523	mediator complex subunit 22
Abhd4	3.47358	abhydrolase domain containing 4
Gcat	3.47047	glycine C-acetyltransferase (2-amino-3-ketobutyrate-coenzyme A ligase)
Dkk3	3.46626	dickkopf homolog 3 (Xenopus laevis)
Zic5	3.45978	zinc finger protein of the cerebellum 5
Gpr176	3.45895	G protein-coupled receptor 176
Pbx3	3.45721	pre B-cell leukemia transcription factor 3
Actr3b	3.45378	ARP3 actin-related protein 3 homolog B (yeast)
Wisp1	3.42149	WNT1 inducible signaling pathway protein 1
Masp1	3.41542	mannan-binding lectin serine peptidase 1
Klhl32	3.40999	kelch-like 32 (Drosophila)
Tulp3	3.3998	tubby-like protein 3
Nkain1	3.3791	Na+/K+ transporting ATPase interacting 1
C1qtnf5 /// Mfrp	3.37522	C1q and tumor necrosis factor related protein 5 /// membrane-type frizzled-related protein
Angptl2	3.37328	angiopoietin-like 2
2700094K13Rik	3.37059	RIKEN cDNA 2700094K13 gene
Egln3	3.36689	EGL nine homolog 3 (C. elegans)
Sulf2	3.36186	sulfatase 2
6430548M08Rik	3.35736	RIKEN cDNA 6430548M08 gene
Plcg1	3.35513	phospholipase C, gamma 1
Tbc1d24	3.35416	TBC1 domain family, member 24
Pla2g4a	3.34685	phospholipase A2, group IVA (cytosolic, calcium-dependent)
Ngfrap1	3.33843	nerve growth factor receptor (TNFRSF16) associated protein 1
Ext2	3.32101	exostoses (multiple) 2
Nol3	3.31994	nucleolar protein 3 (apoptosis repressor with CARD domain)
Igf1r	3.31785	insulin-like growth factor I receptor
Rgs5	3.31707	regulator of G-protein signaling 5
Spats2	3.30987	spermatogenesis associated, serine-rich 2
Apold1	3.30386	apolipoprotein L domain containing 1
Farp2	3.30181	FERM, RhoGEF and pleckstrin domain protein 2
Esm1	3.2972	endothelial cell-specific molecule 1
Sdf2l1	3.29134	stromal cell-derived factor 2-like 1
Ung	3.28289	uracil DNA glycosylase
H2-D1	3.2626	histocompatibility 2, D region locus 1
Nsd1	3.26155	nuclear receptor-binding SET-domain protein 1
Cmc1	3.25492	COX assembly mitochondrial protein homolog (S. cerevisiae)
2210021J22Rik	3.25445	RIKEN cDNA 2210021J22 gene
4930579G24Rik	3.24376	RIKEN cDNA 4930579G24 gene
Galk2	3.2344	galactokinase 2
Hcfc2	3.23205	host cell factor C2
Btg3 /// Gm7334	3.22863	B-cell translocation gene 3 /// B-cell translocation gene 3 pseudogene
Bola2	3.22424	bolA-like 2 (E. coli)
Ano10	3.22312	anoctamin 10
Rtel1	3.2215	regulator of telomere elongation helicase 1
Pon3	3.22034	paraoxonase 3
Lrp12	3.21764	low density lipoprotein-related protein 12
Man1c1	3.21754	mannosidase, alpha, class 1C, member 1
Hrasls	3.21515	HRAS-like suppressor
Smarcad1	3.21365	SWI/SNF-related, matrix-associated actin-dependent regulator of chromatin, subfamily a, containing DEAD/H box 1
Wls	3.21175	wntless homolog (Drosophila)
Tll1	3.20001	tolloid-like
Tbc1d8b	3.19739	TBC1 domain family, member 8B
Slitrk5	3.18969	SLIT and NTRK-like family, member 5
Prickle4 /// Tomm6	3.18528	prickle homolog 4 (Drosophila) /// translocase of outer mitochondrial membrane 6 homolog (yeast)
N4bp3	3.17795	NEDD4 binding protein 3
Dvl2	3.16796	dishevelled 2, dsh homolog (Drosophila)
Arrdc4	3.16395	arrestin domain containing 4
Fam102b	3.16332	family with sequence similarity 102, member B
Axl	3.16126	AXL receptor tyrosine kinase
septin 11	3.15797	septin 11
Bzw2 /// Gm4354 /// Gm5589	3.15671	basic leucine zipper and W2 domains 2 /// predicted gene 4354 /// predicted gene 5589
Pcdh7	3.15465	protocadherin 7
Myo1e	3.15031	myosin IE
Pmepa1	3.13787	prostate transmembrane protein, androgen induced 1
Greb1l	3.13539	growth regulation by estrogen in breast cancer-like
B930036G03Rik	3.13366	RIKEN cDNA B930036G03 gene
Tmem98	3.13117	transmembrane protein 98
Zswim5	3.1304	zinc finger, SWIM domain containing 5
Cd109	3.1287	CD109 antigen
Fbxw2	3.12562	F-box and WD-40 domain protein 2
Hmga2-ps1	3.1247	high mobility group AT-hook 2, pseudogene 1
Efr3b	3.11522	EFR3 homolog B (S. cerevisiae)
Fut8	3.1131	fucosyltransferase 8
Mcm9	3.11206	minichromosome maintenance complex component 9
Cgrrf1	3.11037	cell growth regulator with ring finger domain 1
Fdxr	3.10927	ferredoxin reductase
Syn3	3.10021	synapsin III
Mr1	3.09969	major histocompatibility complex, class I-related
Mex3b	3.0963	mex3 homolog B (C. elegans)
Hspa8 /// LOC624853	3.08986	heat shock protein 8 /// hypothetical LOC624853
Metrnl	3.08007	meteorin, glial cell differentiation regulator-like
Mcts2	3.07823	malignant T cell amplified sequence 2
Nup205	3.07375	nucleoporin 205
Nat10	3.07243	N-acetyltransferase 10
Rassf8	3.06132	Ras association (RalGDS/AF-6) domain family (N-terminal) member 8
Nos1	3.06084	nitric oxide synthase 1, neuronal
Leprel2	3.06014	leprecan-like 2
Ptprs	3.05969	protein tyrosine phosphatase, receptor type, S
Slc25a17	3.05869	solute carrier family 25 (mitochondrial carrier, peroxisomal membrane protein), member 17
Ilf3	3.05776	interleukin enhancer binding factor 3
AI256396 /// LOC100503463	3.05664	EST AI256396 /// hypothetical LOC100503463
Mad1l1	3.05645	mitotic arrest deficient 1-like 1
Zdhhc2	3.05059	zinc finger, DHHC domain containing 2
Snrnp25	3.04467	small nuclear ribonucleoprotein 25 (U11/U12)
Sar1a	3.0444	SAR1 gene homolog A (S. cerevisiae)
3110040N11Rik	3.03699	RIKEN cDNA 3110040N11 gene
Hoxa9	3.03333	homeobox A9
Nenf	3.02898	neuron derived neurotrophic factor
Slc35e4	3.02865	solute carrier family 35, member E4
Nfatc4	3.00715	nuclear factor of activated T-cells, cytoplasmic, calcineurin-dependent 4
Ntng1	3.00227	netrin G1
Serhl	3.00094	serine hydrolase-like
Foxp2	3.00046	forkhead box P2
A330048O09Rik	2.99866	RIKEN cDNA A330048O09 gene
Atp6v0a2	2.9939	ATPase, H+ transporting, lysosomal V0 subunit A2
Rorc	2.99153	RAR-related orphan receptor gamma
Snx12	2.97816	sorting nexin 12
Polr3k	2.97455	polymerase (RNA) III (DNA directed) polypeptide K
B9d1	2.97355	B9 protein domain 1
C030006K11Rik	2.96979	RIKEN cDNA C030006K11 gene
Golt1b	2.96545	golgi transport 1 homolog B (S. cerevisiae)
Akap1	2.96254	A kinase (PRKA) anchor protein 1
Slc20a1	2.96147	solute carrier family 20, member 1
Lgals1	2.95783	lectin, galactose binding, soluble 1
Papola	2.9568	poly (A) polymerase alpha
Pcdhb22	2.95249	protocadherin beta 22
Rnf138	2.95152	ring finger protein 138
Trub2	2.95093	TruB pseudouridine (psi) synthase homolog 2 (E. coli)
Prss41	2.95053	protease, serine, 41
Adcy6	2.95027	adenylate cyclase 6
Rpl23	2.94889	ribosomal protein L23
Foxd1	2.94101	forkhead box D1
B230311B06Rik	2.93953	RIKEN cDNA B230311B06 gene
B4galt2 /// Ccdc24	2.93874	UDP-Gal:betaGlcNAc beta 1,4- galactosyltransferase, polypeptide 2 /// coiled-coil domain containing 24
Iffo2	2.93438	intermediate filament family orphan 2
C1qtnf6	2.92635	C1q and tumor necrosis factor related protein 6
Tspan5	2.92449	tetraspanin 5
Setd5	2.91882	SET domain containing 5
Slc25a34	2.9145	solute carrier family 25, member 34
Mcoln3	2.9114	mucolipin 3
Tmem106b	2.90958	transmembrane protein 106B
Hspa13	2.90583	heat shock protein 70 family, member 13
Fkbp14	2.90474	FK506 binding protein 14
Flrt2	2.8983	fibronectin leucine rich transmembrane protein 2
Wwtr1	2.89593	WW domain containing transcription regulator 1
Irs2	2.89563	insulin receptor substrate 2
Lekr1	2.89152	leucine, glutamate and lysine rich 1
Fbxl7	2.88592	F-box and leucine-rich repeat protein 7
Fbxo10	2.88158	F-box protein 10
Ccdc50	2.88119	coiled-coil domain containing 50
Nudt22	2.87946	nudix (nucleoside diphosphate linked moiety X)-type motif 22
Dtx1	2.87293	deltex 1 homolog (Drosophila)
Pdgfd	2.87185	platelet-derived growth factor, D polypeptide
Arpm1	2.87016	actin related protein M1
Fam183b	2.86958	family with sequence similarity 183, member B
Jam3	2.86877	junction adhesion molecule 3
Tmem159	2.86789	transmembrane protein 159
1810043G02Rik	2.86626	RIKEN cDNA 1810043G02 gene
Phlda3	2.86544	pleckstrin homology-like domain, family A, member 3
Tgfb1	2.86539	transforming growth factor, beta 1
Rhoc	2.86441	ras homolog gene family, member C
Cnih4	2.86346	cornichon homolog 4 (Drosophila)
4930579D07Rik	2.86094	RIKEN cDNA 4930579D07 gene
Atpbd4	2.85766	ATP binding domain 4
Gpr19	2.856	G protein-coupled receptor 19
Sec61a2	2.85564	Sec61, alpha subunit 2 (S. cerevisiae)
Rab22a	2.85555	RAB22A, member RAS oncogene family
Dhrs11	2.85484	dehydrogenase/reductase (SDR family) member 11
Ncor1	2.85288	nuclear receptor co-repressor 1
Fhit	2.84845	fragile histidine triad gene
Pias2	2.84754	protein inhibitor of activated STAT 2
Aox4	2.84681	aldehyde oxidase 4
1810048J11Rik	2.8449	RIKEN cDNA 1810048J11 gene
Acat1	2.84263	acetyl-Coenzyme A acetyltransferase 1
Plod2	2.84132	procollagen lysine, 2-oxoglutarate 5-dioxygenase 2
9030418K01Rik	2.84069	RIKEN cDNA 9030418K01 gene
Apex1	2.84045	apurinic/apyrimidinic endonuclease 1
Trmu	2.83709	tRNA 5-methylaminomethyl-2-thiouridylate methyltransferase
C530028O21Rik	2.83577	RIKEN cDNA C530028O21 gene
C330007P06Rik	2.83554	RIKEN cDNA C330007P06 gene
Mtvr2 /// Sssca1	2.83413	mammary tumor virus receptor 2 /// Sjogren's syndrome/scleroderma autoantigen 1 homolog (human)
2410017P09Rik	2.83183	RIKEN cDNA 2410017P09 gene
Gmfb	2.82538	glia maturation factor, beta
B230118H07Rik	2.82429	RIKEN cDNA B230118H07 gene
Rragd	2.82346	Ras-related GTP binding D
1110038B12Rik	2.81811	RIKEN cDNA 1110038B12 gene
Phgdh	2.81724	3-phosphoglycerate dehydrogenase
Gm11428	2.81546	predicted gene 11428
Mfsd5	2.81503	major facilitator superfamily domain containing 5
Dync2h1	2.8131	dynein cytoplasmic 2 heavy chain 1
B3galtl	2.8127	beta 1,3-galactosyltransferase-like
Zfp820	2.80906	zinc finger protein 820
Gorasp1	2.80707	golgi reassembly stacking protein 1
Fam92a	2.80562	family with sequence similarity 92, member A
Dmrta1	2.80539	doublesex and mab-3 related transcription factor like family A1
Snhg12	2.80143	small nucleolar RNA host gene 12
2610030H06Rik	2.80033	RIKEN cDNA 2610030H06 gene
Pex5l	2.79742	peroxisomal biogenesis factor 5-like
Nmnat3	2.79681	nicotinamide nucleotide adenylyltransferase 3
C1qa	2.79469	complement component 1, q subcomponent, alpha polypeptide
Rab2b	2.79358	RAB2B, member RAS oncogene family
Scand3	2.79089	SCAN domain containing 3
Caprin1	2.78997	cell cycle associated protein 1
Ptchd1	2.78891	patched domain containing 1
Rpl13a	2.78881	ribosomal protein L13A
Herc6	2.78262	hect domain and RLD 6
Csnk1e	2.77637	casein kinase 1, epsilon
Ulk1	2.77551	Unc-51 like kinase 1 (C. elegans)
Slc35a2	2.77496	solute carrier family 35 (UDP-galactose transporter), member A2
Gxylt2	2.77416	glucoside xylosyltransferase 2
Mpv17l2	2.77295	MPV17 mitochondrial membrane protein-like 2
Maf	2.77011	avian musculoaponeurotic fibrosarcoma (v-maf) AS42 oncogene homolog
1700047I17Rik2 /// Fam177a	2.76957	RIKEN cDNA 1700047I17 gene 2 /// family with sequence similarity 177, member A
Ppp1r8	2.76913	protein phosphatase 1, regulatory (inhibitor) subunit 8
Slc39a8	2.76751	solute carrier family 39 (metal ion transporter), member 8
Pigy	2.76307	phosphatidylinositol glycan anchor biosynthesis, class Y
Phactr2	2.75506	phosphatase and actin regulator 2
Ankrd24	2.75242	ankyrin repeat domain 24
Tmem209	2.7502	transmembrane protein 209
Mrps11	2.74014	mitochondrial ribosomal protein S11
Ccng1	2.73939	cyclin G1
Slc12a4	2.73719	solute carrier family 12, member 4
Urb1	2.73614	URB1 ribosome biogenesis 1 homolog (S. cerevisiae)
Nup54	2.73347	nucleoporin 54
Pold4	2.7306	polymerase (DNA-directed), delta 4
Slc36a4	2.73033	solute carrier family 36 (proton/amino acid symporter), member 4
Snord123	2.72879	small nucleolar RNA, C/D box 123
Sdc2	2.72635	syndecan 2
Trappc6a	2.72377	trafficking protein particle complex 6A
S100a13	2.7232	S100 calcium binding protein A13
C430042M11Rik	2.71901	RIKEN cDNA C430042M11 gene
Hoxc9	2.71893	homeobox C9
Dnmt3a	2.71846	DNA methyltransferase 3A
Cstb	2.71387	cystatin B
B630005N14Rik	2.71083	RIKEN cDNA B630005N14 gene
Kdsr	2.70784	3-ketodihydrosphingosine reductase
LOC100503570	2.70656	hypothetical LOC100503570
Atp11a	2.70565	ATPase, class VI, type 11A
H2-D1 /// H2-K1 /// LOC100044874	2.70541	histocompatibility 2, D region locus 1 /// histocompatibility 2, K1, K region /// h-2 class I histocompatibility antigen, K-W28 alpha chain-like
Qser1	2.70352	glutamine and serine rich 1
Omd	2.70193	osteomodulin
Wdsub1	2.70163	WD repeat, SAM and U-box domain containing 1
1500001M20Rik	2.69677	RIKEN cDNA 1500001M20 gene
Ppif	2.6949	peptidylprolyl isomerase F (cyclophilin F)
Klrg2	2.69445	killer cell lectin-like receptor subfamily G, member 2
Pde7a	2.68762	phosphodiesterase 7A
Pick1	2.68353	protein interacting with C kinase 1
Rab31	2.68215	RAB31, member RAS oncogene family
Pomc	2.6773	pro-opiomelanocortin-alpha
Frmd8	2.67404	FERM domain containing 8
Zfp449	2.67344	zinc finger protein 449
2310068J16Rik	2.67275	RIKEN cDNA 2310068J16 gene
C3ar1	2.67025	complement component 3a receptor 1
Naglu	2.66921	alpha-N-acetylglucosaminidase (Sanfilippo disease IIIB)
Atxn10	2.66841	ataxin 10
Ccdc80	2.66552	coiled-coil domain containing 80
Tmem69	2.6609	transmembrane protein 69
2400001E08Rik	2.6596	RIKEN cDNA 2400001E08 gene
Dlg2	2.65878	discs, large homolog 2 (Drosophila)
Rgs2	2.65856	regulator of G-protein signaling 2
Pigx	2.65607	phosphatidylinositol glycan anchor biosynthesis, class X
Pla2g16	2.64967	phospholipase A2, group XVI
Acot11	2.64965	acyl-CoA thioesterase 11
Psph	2.64881	phosphoserine phosphatase
Flt4	2.64822	FMS-like tyrosine kinase 4
Scarb2	2.6474	scavenger receptor class B, member 2
G6pc3	2.64584	glucose 6 phosphatase, catalytic, 3
Osbp2	2.6452	oxysterol binding protein 2
Macrod2	2.6442	MACRO domain containing 2
Timm22	2.64162	translocase of inner mitochondrial membrane 22 homolog (yeast)
Ttc39c	2.64157	tetratricopeptide repeat domain 39C
Cdkn2a	2.64087	cyclin-dependent kinase inhibitor 2A
Dgat1	2.63617	diacylglycerol O-acyltransferase 1
Osgep	2.63349	O-sialoglycoprotein endopeptidase
Msto1	2.63309	misato homolog 1 (Drosophila)
5730437N04Rik	2.63288	RIKEN cDNA 5730437N04 gene
Wars2	2.63092	tryptophanyl tRNA synthetase 2 (mitochondrial)
Serpinh1	2.62866	serine (or cysteine) peptidase inhibitor, clade H, member 1
Hoxa5	2.62597	homeobox A5
Psmg4	2.62548	proteasome (prosome, macropain) assembly chaperone 4
Card14	2.62507	caspase recruitment domain family, member 14
2810001A02Rik	2.62381	RIKEN cDNA 2810001A02 gene
2310016M24Rik	2.62328	RIKEN cDNA 2310016M24 gene
BC027231	2.62169	cDNA sequence BC027231
6330512M04Rik	2.61668	RIKEN cDNA 6330512M04 gene
Wsb2	2.61103	WD repeat and SOCS box-containing 2
Rpa1	2.61012	replication protein A1
Abhd8	2.60924	abhydrolase domain containing 8
Prrx2	2.60391	paired related homeobox 2
Ttbk2	2.60343	tau tubulin kinase 2
Tnfrsf1b	2.60254	tumor necrosis factor receptor superfamily, member 1b
Ifitm2	2.60234	interferon induced transmembrane protein 2
Rgs3	2.60228	regulator of G-protein signaling 3
Sacm1l	2.60167	SAC1 (suppressor of actin mutations 1, homolog)-like (S. cerevisiae)
0610012G03Rik	2.60033	RIKEN cDNA 0610012G03 gene
Mras	2.59934	muscle and microspikes RAS
4930422N03Rik	2.59822	RIKEN cDNA 4930422N03 gene
Steap2	2.58819	six transmembrane epithelial antigen of prostate 2
Chchd3	2.5872	coiled-coil-helix-coiled-coil-helix domain containing 3
Gosr2	2.58669	golgi SNAP receptor complex member 2
Rcan3	2.58489	regulator of calcineurin 3
Ranbp1	2.58224	RAN binding protein 1
Cox15	2.58016	COX15 homolog, cytochrome c oxidase assembly protein (yeast)
2610316D01Rik	2.57874	RIKEN cDNA 2610316D01 gene
Tmem167	2.57827	transmembrane protein 167
Morc4	2.57723	microrchidia 4
Trps1	2.57618	trichorhinophalangeal syndrome I (human)
Dcun1d5	2.57601	DCN1, defective in cullin neddylation 1, domain containing 5 (S. cerevisiae)
Akr1b8	2.57526	aldo-keto reductase family 1, member B8
Abcc5	2.57144	ATP-binding cassette, sub-family C (CFTR/MRP), member 5
Gorab	2.57044	golgin, RAB6-interacting
Hspe1	2.56959	heat shock protein 1 (chaperonin 10)
Lhfpl2	2.56828	lipoma HMGIC fusion partner-like 2
Mtap2	2.5669	microtubule-associated protein 2
Nt5m	2.56628	5',3'-nucleotidase, mitochondrial
Mif	2.56078	macrophage migration inhibitory factor
Rbp1	2.56013	retinol binding protein 1, cellular
AF529169	2.55783	cDNA sequence AF529169
Gngt2	2.55575	guanine nucleotide binding protein (G protein), gamma transducing activity polypeptide 2
Pgcp	2.55162	plasma glutamate carboxypeptidase
Irf4	2.54825	interferon regulatory factor 4
Slc1a4	2.54634	solute carrier family 1 (glutamate/neutral amino acid transporter), member 4
Sec14l1	2.54521	SEC14-like 1 (S. cerevisiae)
Rbm28	2.54465	RNA binding motif protein 28
Tmem55a	2.54412	transmembrane protein 55A
Fcrls	2.53596	Fc receptor-like S, scavenger receptor
Nudt5	2.53372	nudix (nucleoside diphosphate linked moiety X)-type motif 5
1600027N09Rik	2.5313	RIKEN cDNA 1600027N09 gene
Wbscr27	2.52968	Williams Beuren syndrome chromosome region 27 (human)
Pnkd	2.52967	paroxysmal nonkinesiogenic dyskinesia
Dhx37	2.52948	DEAH (Asp-Glu-Ala-His) box polypeptide 37
1700021F05Rik	2.52815	RIKEN cDNA 1700021F05 gene
Arhgef12	2.52519	Rho guanine nucleotide exchange factor (GEF) 12
Phf3	2.52455	PHD finger protein 3
Ttf2	2.52213	transcription termination factor, RNA polymerase II
1300010F03Rik	2.52189	RIKEN cDNA 1300010F03 gene
Nagk	2.52111	N-acetylglucosamine kinase
Aak1	2.51914	AP2 associated kinase 1
Nek6	2.51893	NIMA (never in mitosis gene a)-related expressed kinase 6
Csrp2	2.51631	cysteine and glycine-rich protein 2
Mc2r	2.51437	melanocortin 2 receptor
Hs1bp3	2.5135	HCLS1 binding protein 3
Fam105b	2.51226	family with sequence similarity 105, member B
Ptgr1	2.51134	prostaglandin reductase 1
Patz1	2.51055	POZ (BTB) and AT hook containing zinc finger 1
Tmem17	2.50829	transmembrane protein 17
Rhobtb3	2.50767	Rho-related BTB domain containing 3
Mapk6	2.50421	mitogen-activated protein kinase 6
Rasl10b	2.50365	RAS-like, family 10, member B
C330006K01Rik	2.50265	RIKEN cDNA C330006K01 gene
Ctsb	2.50263	cathepsin B
C1qb	2.50198	complement component 1, q subcomponent, beta polypeptide
Gm5620 /// Gm6682 /// Tuba1a /// Tuba1b /// Tuba1c	2.50043	predicted gene 5620 /// predicted gene 6682 /// tubulin, alpha 1A /// tubulin, alpha 1B /// tubulin, alpha 1C
1110065P20Rik	2.49786	RIKEN cDNA 1110065P20 gene
Mgp	2.49635	matrix Gla protein
9430082L08Rik	2.49177	RIKEN cDNA 9430082L08 gene
Txndc12	2.48938	thioredoxin domain containing 12 (endoplasmic reticulum)
Blcap	2.48836	bladder cancer associated protein homolog (human)
Cc2d1b	2.48818	coiled-coil and C2 domain containing 1B
Taf1c	2.48648	TATA box binding protein (Tbp)-associated factor, RNA polymerase I, C
Ptpn2	2.48585	protein tyrosine phosphatase, non-receptor type 2
Tceal8	2.48341	transcription elongation factor A (SII)-like 8
Gramd4	2.47809	GRAM domain containing 4
Alkbh7	2.47728	alkB, alkylation repair homolog 7 (E. coli)
Cul5	2.47259	cullin 5
Yif1b	2.46797	Yip1 interacting factor homolog B (S. cerevisiae)
Stox2	2.46619	storkhead box 2
Gli3	2.46516	GLI-Kruppel family member GLI3
Pvt1	2.46431	plasmacytoma variant translocation 1
Ctsl	2.46313	cathepsin L
Pofut2	2.4622	protein O-fucosyltransferase 2
Ebf3	2.45657	early B-cell factor 3
Slc37a3	2.45488	solute carrier family 37 (glycerol-3-phosphate transporter), member 3
2310061C15Rik	2.45184	RIKEN cDNA 2310061C15 gene
Zfp9	2.44986	zinc finger protein 9
Athl1	2.44931	ATH1, acid trehalase-like 1 (yeast)
2610306M01Rik	2.44869	RIKEN cDNA 2610306M01 gene
Sft2d2	2.44861	SFT2 domain containing 2
Glt25d1	2.44765	glycosyltransferase 25 domain containing 1
Gadd45g	2.4476	growth arrest and DNA-damage-inducible 45 gamma
Slc10a3	2.44544	solute carrier family 10 (sodium/bile acid cotransporter family), member 3
Pcgf5	2.44396	polycomb group ring finger 5
Slc7a2	2.4439	solute carrier family 7 (cationic amino acid transporter, y+ system), member 2
Chid1	2.44264	chitinase domain containing 1
Ppil6	2.44143	peptidylprolyl isomerase (cyclophilin)-like 6
Josd1	2.44119	Josephin domain containing 1
Eif5a2	2.43919	eukaryotic translation initiation factor 5A2
2700046G09Rik	2.43855	RIKEN cDNA 2700046G09 gene
Epb4.1l1	2.43835	erythrocyte protein band 4.1-like 1
Tmem160	2.43823	transmembrane protein 160
Jazf1	2.43575	JAZF zinc finger 1
Slc35b2	2.43214	solute carrier family 35, member B2
Dhps	2.43064	deoxyhypusine synthase
0710007G10Rik /// Tmem175	2.42927	RIKEN cDNA 0710007G10 gene /// transmembrane protein 175
Tiparp	2.42687	TCDD-inducible poly(ADP-ribose) polymerase
Nars2	2.42654	asparaginyl-tRNA synthetase 2 (mitochondrial)(putative)
Hapln4	2.42522	hyaluronan and proteoglycan link protein 4
Atp6v0a1	2.42408	ATPase, H+ transporting, lysosomal V0 subunit A1
Tomm5	2.42277	translocase of outer mitochondrial membrane 5 homolog (yeast)
Lsm1	2.42244	LSM1 homolog, U6 small nuclear RNA associated (S. cerevisiae)
Tmem203	2.41985	transmembrane protein 203
Txn2	2.41946	thioredoxin 2
Ankrd12	2.41897	ankyrin repeat domain 12
Rab11fip5	2.41891	RAB11 family interacting protein 5 (class I)
Prdx2	2.41712	peroxiredoxin 2
Eif1ad	2.41113	eukaryotic translation initiation factor 1A domain containing
Pcdh9	2.41089	protocadherin 9
Fam105a	2.40477	family with sequence similarity 105, member A
Rwdd4a	2.40316	RWD domain containing 4A
Sec11a	2.40258	SEC11 homolog A (S. cerevisiae)
Fgf11	2.40218	fibroblast growth factor 11
Prcp	2.40202	prolylcarboxypeptidase (angiotensinase C)
Pdcd10	2.40024	programmed cell death 10
Lrch2	2.39955	leucine-rich repeats and calponin homology (CH) domain containing 2
2610301B20Rik	2.39775	RIKEN cDNA 2610301B20 gene
Gm5617	2.39639	predicted gene 5617
Ttc28	2.39269	tetratricopeptide repeat domain 28
Rhbdd2	2.392	rhomboid domain containing 2
Sdc3	2.38987	syndecan 3
Msi2	2.38954	Musashi homolog 2 (Drosophila)
Uggt2	2.38858	UDP-glucose glycoprotein glucosyltransferase 2
Tha1	2.38597	threonine aldolase 1
Gm715	2.38436	predicted pseudogene 715
Zdhhc8	2.38411	zinc finger, DHHC domain containing 8
Sdc4	2.38377	syndecan 4
Mrpl20	2.38103	mitochondrial ribosomal protein L20
Sin3b	2.38006	transcriptional regulator, SIN3B (yeast)
4930452B06Rik	2.37909	RIKEN cDNA 4930452B06 gene
Tatdn3	2.37886	TatD DNase domain containing 3
Pik3ip1	2.3787	phosphoinositide-3-kinase interacting protein 1
Fig4	2.37858	FIG4 homolog (S. cerevisiae)
Utp23	2.37853	UTP23, small subunit (SSU) processome component, homolog (yeast)
Reep3	2.37753	receptor accessory protein 3
Ube2l3	2.37643	ubiquitin-conjugating enzyme E2L 3
Smad3	2.37629	MAD homolog 3 (Drosophila)
Ddr2	2.37501	discoidin domain receptor family, member 2
2810408I11Rik	2.37451	RIKEN cDNA 2810408I11 gene
Sfxn1	2.37385	sideroflexin 1
Mtch1	2.37166	mitochondrial carrier homolog 1 (C. elegans)
Kif1a	2.37099	kinesin family member 1A
Fbxo30	2.36949	F-box protein 30
Adam15	2.36924	a disintegrin and metallopeptidase domain 15 (metargidin)
Pfkfb2	2.3668	6-phosphofructo-2-kinase/fructose-2,6-biphosphatase 2
Gnb5	2.36648	guanine nucleotide binding protein (G protein), beta 5
6330578E17Rik	2.36545	RIKEN cDNA 6330578E17 gene
Cox4nb	2.36526	COX4 neighbor
Hspb11	2.36322	heat shock protein family B (small), member 11
Trappc3	2.3623	trafficking protein particle complex 3
Dzip1	2.36223	DAZ interacting protein 1
Noc3l	2.36188	nucleolar complex associated 3 homolog (S. cerevisiae)
Stt3b	2.36154	STT3, subunit of the oligosaccharyltransferase complex, homolog B (S. cerevisiae)
Cnnm1	2.36146	cyclin M1
Efna5	2.36132	ephrin A5
Ikbip	2.35959	IKBKB interacting protein
D15Ertd621e	2.35951	DNA segment, Chr 15, ERATO Doi 621, expressed
4933403F05Rik	2.35325	RIKEN cDNA 4933403F05 gene
Uxt	2.35185	ubiquitously expressed transcript
Got2	2.35078	glutamate oxaloacetate transaminase 2, mitochondrial
Wscd1	2.35019	WSC domain containing 1
Rps19bp1	2.34816	ribosomal protein S19 binding protein 1
Slc25a40	2.34711	solute carrier family 25, member 40
9030624J02Rik	2.34519	RIKEN cDNA 9030624J02 gene
Slc25a30	2.34369	solute carrier family 25, member 30
1810013D10Rik	2.34226	RIKEN cDNA 1810013D10 gene
Ftl1 /// Ftl2 /// LOC100504993 /// Mir692-1	2.34118	ferritin light chain 1 /// ferritin light chain 2 /// hypothetical LOC100504993 /// microRNA 692-1
Lima1	2.34109	LIM domain and actin binding 1
Zfp386	2.34073	zinc finger protein 386 (Kruppel-like)
Slc35b4	2.34026	solute carrier family 35, member B4
Mrpl34	2.34017	mitochondrial ribosomal protein L34
Chml	2.34007	choroideremia-like
Bdnf	2.3379	brain derived neurotrophic factor
Snhg10	2.33522	small nucleolar RNA host gene (non-protein coding) 10
Mtpn	2.33512	myotrophin
Nme1	2.33401	non-metastatic cells 1, protein (NM23A) expressed in
Timm50	2.33375	translocase of inner mitochondrial membrane 50 homolog (yeast)
Larp4	2.33364	La ribonucleoprotein domain family, member 4
Rrp36	2.33242	ribosomal RNA processing 36 homolog (S. cerevisiae)
Mus81	2.33178	MUS81 endonuclease homolog (yeast)
Pus7l	2.33082	pseudouridylate synthase 7 homolog (S. cerevisiae)-like
Pappa	2.32956	pregnancy-associated plasma protein A
Arl2	2.32932	ADP-ribosylation factor-like 2
Inpp4b	2.32923	inositol polyphosphate-4-phosphatase, type II
Ubxn4	2.32915	UBX domain protein 4
8030445P17Rik	2.32865	RIKEN cDNA 8030445P17 gene
Bsg	2.32777	basigin
Apaf1	2.32667	apoptotic peptidase activating factor 1
B3galt1	2.32591	UDP-Gal:betaGlcNAc beta 1,3-galactosyltransferase, polypeptide 1
Timm8a1	2.32542	translocase of inner mitochondrial membrane 8 homolog a1 (yeast)
St13	2.32374	suppression of tumorigenicity 13
Olfm2	2.32338	olfactomedin 2
Alg12	2.32201	asparagine-linked glycosylation 12 homolog (yeast, alpha-1,6-mannosyltransferase)
Ippk	2.32188	inositol 1,3,4,5,6-pentakisphosphate 2-kinase
Cd72	2.32133	CD72 antigen
Pop7	2.31995	processing of precursor 7, ribonuclease P family, (S. cerevisiae)
Hif1a	2.31959	hypoxia inducible factor 1, alpha subunit
Pigk	2.3194	phosphatidylinositol glycan anchor biosynthesis, class K
Socs3	2.31748	suppressor of cytokine signaling 3
Sgsm3	2.31552	small G protein signaling modulator 3
Fstl3	2.3131	follistatin-like 3
2310043J07Rik	2.31309	RIKEN cDNA 2310043J07 gene
Glrx2	2.31237	glutaredoxin 2 (thioltransferase)
Entpd7	2.31212	ectonucleoside triphosphate diphosphohydrolase 7
Srprb	2.31083	signal recognition particle receptor, B subunit
Creld2	2.30689	cysteine-rich with EGF-like domains 2
Sobp	2.30634	sine oculis-binding protein homolog (Drosophila)
Mdga1	2.30622	MAM domain containing glycosylphosphatidylinositol anchor 1
Pspc1	2.30278	paraspeckle protein 1
Tia1	2.30218	cytotoxic granule-associated RNA binding protein 1
Tmtc4	2.30174	transmembrane and tetratricopeptide repeat containing 4
Tomm20	2.3002	translocase of outer mitochondrial membrane 20 homolog (yeast)
Eif2ak4	2.2994	eukaryotic translation initiation factor 2 alpha kinase 4
Tbca	2.29858	tubulin cofactor A
Fam119a	2.29631	family with sequence similarity 119, member A
Mkks	2.29446	McKusick-Kaufman syndrome protein
Arf4	2.29427	ADP-ribosylation factor 4
A230046K03Rik	2.2889	RIKEN cDNA A230046K03 gene
4632434I11Rik	2.28877	RIKEN cDNA 4632434I11 gene
Fuca1	2.28796	fucosidase, alpha-L- 1, tissue
Eya3	2.28712	eyes absent 3 homolog (Drosophila)
LOC100503807	2.28702	hypothetical protein LOC100503807
Pitrm1	2.28563	pitrilysin metallepetidase 1
Fn3k	2.28311	fructosamine 3 kinase
Ubxn7	2.28285	UBX domain protein 7
Slc30a4	2.28245	solute carrier family 30 (zinc transporter), member 4
Pde6d	2.28205	phosphodiesterase 6D, cGMP-specific, rod, delta
Fastkd2	2.28203	FAST kinase domains 2
Rrn3	2.28177	RRN3 RNA polymerase I transcription factor homolog (yeast)
Vps25	2.2805	vacuolar protein sorting 25 (yeast)
Gm7072	2.2796	predicted gene 7072
Phtf2	2.27936	Putative homeodomain transcription factor 2
Cotl1	2.27907	coactosin-like 1 (Dictyostelium)
Slc39a1	2.27877	solute carrier family 39 (zinc transporter), member 1
2610002I17Rik	2.27872	RIKEN cDNA 2610002I17
1700029F09Rik	2.27819	RIKEN cDNA 1700029F09 gene
Ndufaf4	2.27661	NADH dehydrogenase (ubiquinone) 1 alpha subcomplex, assembly factor 4
Tgs1	2.27527	trimethylguanosine synthase homolog (S. cerevisiae)
Adnp2	2.27509	ADNP homeobox 2
Tpp1	2.27277	tripeptidyl peptidase I
Psmd13	2.2719	proteasome (prosome, macropain) 26S subunit, non-ATPase, 13
Ddx19b	2.27169	DEAD (Asp-Glu-Ala-Asp) box polypeptide 19b
Snhg7	2.26802	small nucleolar RNA host gene (non-protein coding) 7
5730403B10Rik	2.26577	RIKEN cDNA 5730403B10 gene
Fam96b	2.26547	family with sequence similarity 96, member B
Alpl	2.2644	alkaline phosphatase, liver/bone/kidney
Igfbp3	2.26371	insulin-like growth factor binding protein 3
Ccdc122	2.26189	coiled-coil domain containing 122
Vps41	2.26039	vacuolar protein sorting 41 (yeast)
Tor1aip2	2.25966	torsin A interacting protein 2
Gmppb	2.25768	GDP-mannose pyrophosphorylase B
Naa40	2.2568	N(alpha)-acetyltransferase 40, NatD catalytic subunit, homolog (S. cerevisiae)
2310045N01Rik	2.25668	RIKEN cDNA 2310045N01 gene
Mtmr9	2.25525	myotubularin related protein 9
Lzic	2.25356	leucine zipper and CTNNBIP1 domain containing
2810428I15Rik	2.25301	RIKEN cDNA 2810428I15 gene
H2-T10 /// H2-T22 /// H2-T9	2.25293	histocompatibility 2, T region locus 10 /// histocompatibility 2, T region locus 22 /// histocompatibility 2, T region locus 9
Nf2	2.2527	neurofibromatosis 2
Gaa	2.25219	glucosidase, alpha, acid
Tatdn1	2.25192	TatD DNase domain containing 1
Sec61g	2.25161	SEC61, gamma subunit
Eda2r	2.25039	ectodysplasin A2 receptor
Slc16a1	2.24752	solute carrier family 16 (monocarboxylic acid transporters), member 1
Pcmt1	2.24624	protein-L-isoaspartate (D-aspartate) O-methyltransferase 1
Cntfr	2.24597	ciliary neurotrophic factor receptor
Commd3	2.24593	COMM domain containing 3
Tmem184c	2.2452	transmembrane protein 184C
Epha5	2.24434	Eph receptor A5
Flnb	2.24386	filamin, beta
2310001H12Rik	2.24185	RIKEN cDNA 2310001H12 gene
Cpne8	2.2416	copine VIII
Prmt3	2.24158	protein arginine N-methyltransferase 3
Timm10	2.24134	translocase of inner mitochondrial membrane 10 homolog (yeast)
Pmm1	2.24127	phosphomannomutase 1
Stx8	2.24058	syntaxin 8
Inpp5a	2.23857	inositol polyphosphate-5-phosphatase A
Clpp	2.23748	caseinolytic peptidase, ATP-dependent, proteolytic subunit homolog (E. coli)
Aldh18a1	2.23649	aldehyde dehydrogenase 18 family, member A1
Dusp18	2.23567	dual specificity phosphatase 18
Pex13	2.23534	peroxisomal biogenesis factor 13
Atpaf1	2.23262	ATP synthase mitochondrial F1 complex assembly factor 1
Med9	2.23221	mediator of RNA polymerase II transcription, subunit 9 homolog (yeast)
Vps18	2.23205	vacuolar protein sorting 18 (yeast)
Th	2.23169	tyrosine hydroxylase
Lrch4 /// Lrch4-sap25 /// Sap25	2.22905	leucine-rich repeats and calponin homology (CH) domain containing 4 /// Lrch4-Sap25 gene /// sin3 associated polypeptide
Fam38a	2.22617	family with sequence similarity 38, member A
2310003L22Rik	2.22539	RIKEN cDNA 2310003L22 gene
Ddah1	2.22536	dimethylarginine dimethylaminohydrolase 1
Pck2	2.22491	phosphoenolpyruvate carboxykinase 2 (mitochondrial)
Gm16515	2.22381	predicted gene, Gm16515
Rpl14	2.2237	ribosomal protein L14
Ipo5	2.22279	importin 5
2310021P13Rik	2.22202	RIKEN cDNA 2310021P13 gene
Fam114a1	2.22097	family with sequence similarity 114, member A1
Wdr61	2.2204	WD repeat domain 61
Efemp2	2.22033	epidermal growth factor-containing fibulin-like extracellular matrix protein 2
Gipc1	2.21965	GIPC PDZ domain containing family, member 1
Zswim7	2.21866	zinc finger, SWIM-type containing 7
Rpusd3	2.21604	RNA pseudouridylate synthase domain containing 3
Taf1d	2.21305	TATA box binding protein (Tbp)-associated factor, RNA polymerase I, D
Rab4a	2.2125	RAB4A, member RAS oncogene family
Coro7	2.21243	coronin 7
Dbnl	2.2109	drebrin-like
Cd55	2.20913	CD55 antigen
Gna13	2.20718	guanine nucleotide binding protein, alpha 13
Nkiras2	2.20692	NFKB inhibitor interacting Ras-like protein 2
Ap3b1	2.20688	adaptor-related protein complex 3, beta 1 subunit
Gfer	2.20685	growth factor, erv1 (S. cerevisiae)-like (augmenter of liver regeneration)
Pms1	2.20669	postmeiotic segregation increased 1 (S. cerevisiae)
Rasa4	2.20493	RAS p21 protein activator 4
Arl8a	2.20298	ADP-ribosylation factor-like 8A
Lrrc14	2.20292	leucine rich repeat containing 14
Rps6ka3	2.20087	ribosomal protein S6 kinase polypeptide 3
Tctn3	2.20028	tectonic family member 3
Eps15l1	2.2001	epidermal growth factor receptor pathway substrate 15-like 1
Fis1	2.19869	fission 1 (mitochondrial outer membrane) homolog (yeast)
Batf	2.19826	basic leucine zipper transcription factor, ATF-like
Ppp6r2	2.19782	protein phosphatase 6, regulatory subunit 2
Ncbp2	2.19686	nuclear cap binding protein subunit 2
Sertad4	2.19311	SERTA domain containing 4
Prdm5	2.19203	PR domain containing 5
Ccdc53	2.18947	coiled-coil domain containing 53
Ufm1	2.18775	ubiquitin-fold modifier 1
1110012L19Rik	2.18697	RIKEN cDNA 1110012L19 gene
C85492	2.18687	expressed sequence C85492
2700078E11Rik	2.18662	RIKEN cDNA 2700078E11 gene
Dnajc1	2.18594	DnaJ (Hsp40) homolog, subfamily C, member 1
H2-K1	2.18575	histocompatibility 2, K1, K region
Rtcd1	2.18465	RNA terminal phosphate cyclase domain 1
2310067B10Rik	2.18414	RIKEN cDNA 2310067B10 gene
Dnajc25	2.18366	DnaJ (Hsp40) homolog, subfamily C, member 25
Cdk5rap2	2.1836	CDK5 regulatory subunit associated protein 2
Lix1	2.18323	limb expression 1 homolog (chicken)
Lepre1	2.18318	leprecan 1
Drap1	2.18174	Dr1 associated protein 1 (negative cofactor 2 alpha)
Kif3b	2.1806	kinesin family member 3B
Phf20	2.1803	PHD finger protein 20
Slc37a2	2.17944	solute carrier family 37 (glycerol-3-phosphate transporter), member 2
Ccdc126	2.17861	coiled-coil domain containing 126
Trmt2b	2.17852	TRM2 tRNA methyltransferase 2 homolog B (S. cerevisiae)
Slc48a1	2.17821	solute carrier family 48 (heme transporter), member 1
Lrrc59	2.17811	leucine rich repeat containing 59
Srd5a3	2.17733	steroid 5 alpha-reductase 3
Gpr89	2.17712	G protein-coupled receptor 89
5730528L13Rik	2.17522	RIKEN cDNA 5730528L13 gene
A230050P20Rik	2.17451	RIKEN cDNA A230050P20 gene
Rabgap1l	2.17414	RAB GTPase activating protein 1-like
Dhrs7b	2.17283	dehydrogenase/reductase (SDR family) member 7B
Lrpprc	2.17264	leucine-rich PPR-motif containing
Ss18	2.17243	synovial sarcoma translocation, Chromosome 18
Rell1	2.17217	RELT-like 1
Cdc42bpa	2.17112	CDC42 binding protein kinase alpha
Fam58b	2.16883	family with sequence similarity 58, member B
Pkdcc	2.16872	protein kinase domain containing, cytoplasmic
Gm2695	2.16753	predicted gene 2695
Utp18	2.16724	UTP18, small subunit (SSU) processome component, homolog (yeast)
Gnb4	2.16693	guanine nucleotide binding protein (G protein), beta 4
Wbp5	2.16671	WW domain binding protein 5
1110036O03Rik	2.16651	RIKEN cDNA 1110036O03 gene
Fbxo27	2.1665	F-box protein 27
Ccl2	2.16575	chemokine (C-C motif) ligand 2
Gnb1l	2.16542	guanine nucleotide binding protein (G protein), beta polypeptide 1-like
Prr18	2.16463	proline rich region 18
Clcn5	2.16359	chloride channel 5
Pdia6	2.16357	protein disulfide isomerase associated 6
1810012P15Rik	2.16304	RIKEN cDNA 1810012P15 gene
0610009L18Rik	2.16243	RIKEN cDNA 0610009L18 gene
Cenpw	2.16056	centromere protein W
Med27	2.15834	mediator complex subunit 27
Syt5	2.15794	synaptotagmin V
LOC100503222	2.15792	hypothetical LOC100503222
Fcgr1	2.15517	Fc receptor, IgG, high affinity I
Mrm1	2.15464	mitochondrial rRNA methyltransferase 1 homolog (S. cerevisiae)
Sgip1	2.1543	SH3-domain GRB2-like (endophilin) interacting protein 1
Nfic	2.15326	nuclear factor I/C
Ccdc23	2.15286	coiled-coil domain containing 23
Dzip3	2.15264	DAZ interacting protein 3, zinc finger
Scamp5	2.15237	secretory carrier membrane protein 5
Cd99l2	2.15235	CD99 antigen-like 2
Pdzd11	2.15083	PDZ domain containing 11
Angpt2	2.15064	angiopoietin 2
BC057079	2.14807	cDNA sequence BC057079
Fam98a	2.14695	family with sequence similarity 98, member A
Sbno1	2.14603	sno, strawberry notch homolog 1 (Drosophila)
Abca2	2.14414	ATP-binding cassette, sub-family A (ABC1), member 2
Rabl5	2.1441	RAB, member of RAS oncogene family-like 5
Pmpcb	2.14384	peptidase (mitochondrial processing) beta
Fjx1	2.14377	four jointed box 1 (Drosophila)
Ubfd1	2.1415	ubiquitin family domain containing 1
Alg2	2.13996	asparagine-linked glycosylation 2 homolog (yeast, alpha-1,3-mannosyltransferase)
Zfp704	2.13966	zinc finger protein 704
Tbx18	2.13951	T-box18
1810030N24Rik	2.13878	RIKEN cDNA 1810030N24 gene
Serinc4	2.13819	serine incorporator 4
Lpar1	2.138	lysophosphatidic acid receptor 1
D11Wsu99e	2.13798	DNA segment, Chr 11, Wayne State University 99, expressed
Dad1	2.13724	defender against cell death 1
Aen	2.13654	apoptosis enhancing nuclease
Aars	2.13652	alanyl-tRNA synthetase
Txnl1	2.13638	thioredoxin-like 1
Ggnbp2	2.13544	gametogenetin binding protein 2
Kctd17	2.13437	potassium channel tetramerisation domain containing 17
Slc9a9	2.134	solute carrier family 9 (sodium/hydrogen exchanger), member 9
Ppard	2.13257	peroxisome proliferator activator receptor delta
Umps	2.13008	uridine monophosphate synthetase
Gabarap	2.12965	gamma-aminobutyric acid receptor associated protein
L3mbtl2	2.12867	l(3)mbt-like 2 (Drosophila)
Rmnd5a	2.12864	required for meiotic nuclear division 5 homolog A (S. cerevisiae)
Arsb	2.12833	arylsulfatase B
Snhg3	2.12786	small nucleolar RNA host gene (non-protein coding) 3
Kirrel3	2.12684	kin of IRRE like 3 (Drosophila)
Slc41a3	2.1261	solute carrier family 41, member 3
1700112E06Rik	2.12609	RIKEN cDNA 1700112E06 gene
0610038B21Rik	2.12448	RIKEN cDNA 0610038B21 gene
Wdr12	2.12433	WD repeat domain 12
1110038F14Rik	2.12396	RIKEN cDNA 1110038F14 gene
2610034E01Rik	2.1238	RIKEN cDNA 2610034E01 gene
Syngr1	2.12352	synaptogyrin 1
Vti1a	2.12326	vesicle transport through interaction with t-SNAREs homolog 1A (yeast)
Tasp1	2.12228	taspase, threonine aspartase 1
Pqlc3	2.12005	PQ loop repeat containing
Hmox2	2.11991	heme oxygenase (decycling) 2
N6amt2	2.11874	N-6 adenine-specific DNA methyltransferase 2 (putative)
Fkbp10	2.11689	FK506 binding protein 10
Akr1b7	2.1151	aldo-keto reductase family 1, member B7
Stk38l	2.11448	serine/threonine kinase 38 like
Tnip1	2.11311	TNFAIP3 interacting protein 1
Vipar	2.11306	VPS33B interacting protein, apical-basolateral polarity regulator
Copz2	2.11258	coatomer protein complex, subunit zeta 2
Atg7	2.11222	autophagy-related 7 (yeast)
Cyp4f16 /// Gm9705	2.11153	cytochrome P450, family 4, subfamily f, polypeptide 16 /// predicted gene 9705
Cox7a2l	2.11139	cytochrome c oxidase subunit VIIa polypeptide 2-like
Ece2	2.11138	endothelin converting enzyme 2
Eefsec	2.11012	eukaryotic elongation factor, selenocysteine-tRNA-specific
Map3k7	2.10979	mitogen-activated protein kinase kinase kinase 7
Foxk2	2.10907	forkhead box K2
Sirpa	2.10906	signal-regulatory protein alpha
Gm14325 /// Gm14326 /// Gm14430 /// Gm14434 /// Gm6710	2.10631	predicted gene 14325 /// predicted gene 14326 /// predicted gene 14430 /// predicted gene 14434 /// predicted gene 6710
2900053A13Rik /// LOC100503890	2.10549	RIKEN cDNA 2900053A13 gene /// hypothetical protein LOC100503890
Adat2	2.10535	adenosine deaminase, tRNA-specific 2, TAD2 homolog (S. cerevisiae)
Dcaf17	2.10521	DDB1 and CUL4 associated factor 17
Nubp1	2.10511	nucleotide binding protein 1
Rnaset2a /// Rnaset2b	2.10505	ribonuclease T2A /// ribonuclease T2B
Scpep1	2.10479	serine carboxypeptidase 1
Ptpn14	2.10408	protein tyrosine phosphatase, non-receptor type 14
Gab2	2.10273	growth factor receptor bound protein 2-associated protein 2
Rabep2	2.10154	rabaptin, RAB GTPase binding effector protein 2
Vps53	2.10074	vacuolar protein sorting 53 (yeast)
Mctp2	2.10059	multiple C2 domains, transmembrane 2
LOC100504522	2.10044	hypothetical LOC100504522
S1pr2	2.10029	sphingosine-1-phosphate receptor 2
Rcor3	2.09969	REST corepressor 3
Rps6kb1	2.09844	ribosomal protein S6 kinase, polypeptide 1
Sel1l	2.09823	sel-1 suppressor of lin-12-like (C. elegans)
A830080D01Rik	2.0977	RIKEN cDNA A830080D01 gene
Fuca2	2.09756	fucosidase, alpha-L- 2, plasma
Mrpl2	2.09593	mitochondrial ribosomal protein L2
Armc9	2.09559	armadillo repeat containing 9
Mmp16	2.09349	matrix metallopeptidase 16
Klhl8	2.09262	kelch-like 8 (Drosophila)
Mlec	2.0924	malectin
1110054O05Rik	2.09131	RIKEN cDNA 1110054O05 gene
Cdc27	2.09104	cell division cycle 27 homolog (S. cerevisiae)
Wdr37	2.09053	WD repeat domain 37
Aprt	2.08991	adenine phosphoribosyl transferase
Sec13	2.08887	SEC13 homolog (S. cerevisiae)
Sesn2	2.08859	sestrin 2
Rpusd4	2.08777	RNA pseudouridylate synthase domain containing 4
Hspbap1	2.08621	Hspb associated protein 1
Cnpy2	2.08548	canopy 2 homolog (zebrafish)
Rbx1	2.08537	ring-box 1
5033430I15Rik	2.08522	RIKEN cDNA 5033430I15 gene
Serf2	2.08435	small EDRK-rich factor 2
Pdgfb	2.08421	platelet derived growth factor, B polypeptide
Mgmt	2.08255	O-6-methylguanine-DNA methyltransferase
Acbd3	2.08174	acyl-Coenzyme A binding domain containing 3
Lpar2	2.08029	lysophosphatidic acid receptor 2
Creb3l2	2.0797	cAMP responsive element binding protein 3-like 2
Arv1	2.07957	ARV1 homolog (yeast)
2310028O11Rik	2.07935	RIKEN cDNA 2310028O11 gene
Fbxo3	2.07923	F-box protein 3
Ube2g2	2.07909	ubiquitin-conjugating enzyme E2G 2
Mrps23	2.07885	mitochondrial ribosomal protein S23
Mrrf	2.07842	mitochondrial ribosome recycling factor
Thap7	2.07828	THAP domain containing 7
Ppt2	2.07539	palmitoyl-protein thioesterase 2
AI414108	2.07516	expressed sequence AI414108
4632404H12Rik	2.07485	RIKEN cDNA 4632404H12 gene
Ap3s2	2.07377	adaptor-related protein complex 3, sigma 2 subunit
Snapin	2.07371	SNAP-associated protein
Timm13	2.07298	translocase of inner mitochondrial membrane 13 homolog (yeast)
Epdr1	2.07236	ependymin related protein 1 (zebrafish)
Leprotl1	2.07148	leptin receptor overlapping transcript-like 1
Aacs	2.07145	acetoacetyl-CoA synthetase
Lrsam1	2.07097	leucine rich repeat and sterile alpha motif containing 1
Opa3	2.07077	optic atrophy 3 (human)
Ptprg	2.07061	protein tyrosine phosphatase, receptor type, G
Slc30a7	2.06977	solute carrier family 30 (zinc transporter), member 7
Gfm1	2.06975	G elongation factor, mitochondrial 1
Cenpp	2.06908	centromere protein P
2610029G23Rik	2.06906	RIKEN cDNA 2610029G23 gene
Prune2	2.06748	prune homolog 2 (Drosophila)
Fam184a	2.06723	family with sequence similarity 184, member A
Atp11c	2.06714	ATPase, class VI, type 11C
Alkbh5	2.06714	alkB, alkylation repair homolog 5 (E. coli)
Prps2	2.06691	phosphoribosyl pyrophosphate synthetase 2
Ttc21b	2.06619	tetratricopeptide repeat domain 21B
1600012F09Rik	2.06609	RIKEN cDNA 1600012F09 gene
Polr1d	2.06562	polymerase (RNA) I polypeptide D
Cbx7	2.06544	chromobox homolog 7
Nxn	2.06539	nucleoredoxin
Nckipsd	2.06405	NCK interacting protein with SH3 domain
Psrc1	2.06385	proline/serine-rich coiled-coil 1
LOC100503839 /// Serf2	2.06366	small EDRK-rich factor 2-like /// small EDRK-rich factor 2
Slc19a2	2.06297	solute carrier family 19 (thiamine transporter), member 2
Ssr1	2.06292	signal sequence receptor, alpha
2610002J02Rik	2.06177	RIKEN cDNA 2610002J02 gene
4933433P14Rik	2.06164	RIKEN cDNA 4933433P14 gene
Cfl2	2.0615	cofilin 2, muscle
5430411C19Rik	2.06146	RIKEN cDNA 5430411C19 gene
Ndufs4	2.06113	NADH dehydrogenase (ubiquinone) Fe-S protein 4
Jmjd7 /// Pla2g4b	2.06112	jumonji domain containing 7 /// phospholipase A2, group IVB (cytosolic)
AI597468	2.06074	expressed sequence AI597468
Akt1	2.0604	thymoma viral proto-oncogene 1
Alg5	2.05919	asparagine-linked glycosylation 5 homolog (yeast, dolichyl-phosphate beta-glucosyltransferase)
Txlng	2.05919	taxilin gamma
Mia1	2.05877	melanoma inhibitory activity 1
1700007L15Rik /// LOC100502742	2.0578	RIKEN cDNA 1700007L15 gene /// hypothetical LOC100502742
Ubr7	2.05752	ubiquitin protein ligase E3 component n-recognin 7 (putative)
Tprkb	2.05704	Tp53rk binding protein
Dnajc2	2.05684	DnaJ (Hsp40) homolog, subfamily C, member 2
Pwwp2b	2.05505	PWWP domain containing 2B
5730494M16Rik	2.05486	RIKEN cDNA 5730494M16 gene
Slc6a2	2.05394	solute carrier family 6 (neurotransmitter transporter, noradrenalin), member 2
Seh1l	2.05327	SEH1-like (S. cerevisiae
AW050198	2.05142	expressed sequence AW050198
Zfpm2	2.05068	zinc finger protein, multitype 2
Taf4b	2.05035	TAF4B RNA polymerase II, TATA box binding protein (TBP)-associated factor
Slc38a7	2.04919	solute carrier family 38, member 7
2610524H06Rik	2.04889	RIKEN cDNA 2610524H06 gene
Mthfd2	2.04841	methylenetetrahydrofolate dehydrogenase (NAD+ dependent), methenyltetrahydrofolate cyclohydrolase
1810027O10Rik	2.04825	RIKEN cDNA 1810027O10 gene
Tmem185b	2.04736	transmembrane protein 185B
Ncam1	2.0466	neural cell adhesion molecule 1
Fam125a	2.04644	family with sequence similarity 125, member A
D17Wsu104e	2.04641	DNA segment, Chr 17, Wayne State University 104, expressed
Efr3a	2.04616	EFR3 homolog A (S. cerevisiae)
Cdkn2b	2.04599	cyclin-dependent kinase inhibitor 2B (p15, inhibits CDK4)
Arpc1a	2.04585	actin related protein 2/3 complex, subunit 1A
Fahd2a	2.04581	fumarylacetoacetate hydrolase domain containing 2A
P4ha1	2.04545	procollagen-proline, 2-oxoglutarate 4-dioxygenase (proline 4-hydroxylase), alpha 1 polypeptide
Bace1	2.04457	beta-site APP cleaving enzyme 1
Dolk	2.04373	dolichol kinase
2310079N02Rik	2.04361	RIKEN cDNA 2310079N02 gene
Tfpt	2.04265	TCF3 (E2A) fusion partner
Ikbkg	2.04237	inhibitor of kappaB kinase gamma
Pign	2.0421	phosphatidylinositol glycan anchor biosynthesis, class N
D11Wsu47e	2.04194	DNA segment, Chr 11, Wayne State University 47, expressed
Tmem168	2.04134	transmembrane protein 168
Ift27	2.04045	intraflagellar transport 27 homolog (Chlamydomonas)
Abcb7	2.04023	ATP-binding cassette, sub-family B (MDR/TAP), member 7
Btf3l4	2.03965	basic transcription factor 3-like 4
Tmem120b	2.03929	transmembrane protein 120B
Tmlhe	2.0391	trimethyllysine hydroxylase, epsilon
2310047K21Rik	2.03888	RIKEN cDNA 2310047K21 gene
Wdr4	2.03885	WD repeat domain 4
Kdelc2	2.0378	KDEL (Lys-Asp-Glu-Leu) containing 2
Gins2	2.03713	GINS complex subunit 2 (Psf2 homolog)
Efcab3	2.03643	EF-hand calcium binding domain 3
Ubac2	2.03637	ubiquitin associated domain containing 2
Prmt6	2.03555	protein arginine N-methyltransferase 6
Rps21	2.03482	ribosomal protein S21
Ap2b1	2.03318	adaptor-related protein complex 2, beta 1 subunit
Pnmt	2.03317	phenylethanolamine-N-methyltransferase
Fam173b	2.03238	family with sequence similarity 173, member B
Dnalc4	2.03206	dynein, axonemal, light chain 4
Slc25a39	2.03172	solute carrier family 25, member 39
Anapc11	2.03019	anaphase promoting complex subunit 11
Phospho2	2.02976	phosphatase, orphan 2
Cbwd1	2.02937	COBW domain containing 1
3200002M19Rik	2.02722	RIKEN cDNA 3200002M19 gene
Pax9	2.02634	paired box gene 9
Mmab	2.02629	methylmalonic aciduria (cobalamin deficiency) type B homolog (human)
Otos	2.02593	otospiralin
Dynlt1a /// Dynlt1b /// Dynlt1c /// Dynlt1e /// Dynlt1f	2.02471	dynein light chain Tctex-type 1A /// dynein light chain Tctex-type 1D /// dynein light chain Tctex-type 1C /// dynein light chain Tctex-type 1E /// dynein light chain Tctex-type 1F
Sema4b	2.02373	sema domain, immunoglobulin domain (Ig), transmembrane domain (TM) and short cytoplasmic domain, (semaphorin) 4B
Klhl15	2.02359	kelch-like 15 (Drosophila)
Stard6	2.0231	StAR-related lipid transfer (START) domain containing 6
Ptdss2	2.02142	phosphatidylserine synthase 2
Zzz3	2.02136	zinc finger, ZZ domain containing 3
Shc1	2.02104	src homology 2 domain-containing transforming protein C1
0610010K06Rik	2.0208	RIKEN cDNA 0610010K06 gene
6330416L07Rik	2.02046	RIKEN cDNA 6330416L07 gene
Snhg8	2.0198	small nucleolar RNA host gene 8
Tubb6	2.01949	tubulin, beta 6
Bcl2l2	2.01851	BCL2-like 2
Nans	2.01838	N-acetylneuraminic acid synthase (sialic acid synthase)
Chpf2	2.0183	chondroitin polymerizing factor 2
Clcn7	2.01816	chloride channel 7
Ppp3cc	2.01809	protein phosphatase 3, catalytic subunit, gamma isoform
Tmem129	2.01793	transmembrane protein 129
Tap1	2.01787	transporter 1, ATP-binding cassette, sub-family B (MDR/TAP)
Msi1	2.01786	Musashi homolog 1(Drosophila)
Mettl1	2.01773	methyltransferase like 1
Snx32	2.0167	sorting nexin 32
Rcbtb1	2.01654	regulator of chromosome condensation (RCC1) and BTB (POZ) domain containing protein 1
Mmp14	2.0162	matrix metallopeptidase 14 (membrane-inserted)
Trip6	2.01571	thyroid hormone receptor interactor 6
2310035K24Rik	2.01561	RIKEN cDNA 2310035K24 gene
Dennd2a	2.01504	DENN/MADD domain containing 2A
Rpl17	2.01427	ribosomal protein L17
Sfmbt1	2.0139	Scm-like with four mbt domains 1
Lcorl	2.01361	ligand dependent nuclear receptor corepressor-like
Fam120a	2.01306	family with sequence similarity 120, member A
Mrp63	2.01219	mitochondrial ribosomal protein 63
Slc30a6	2.01189	solute carrier family 30 (zinc transporter), member 6
Fastkd5	2.01188	FAST kinase domains 5
Npc2	2.01123	Niemann Pick type C2
Thsd7a	2.01042	thrombospondin, type I, domain containing 7A
Gnao1	2.00961	guanine nucleotide binding protein, alpha O
Uhrf1bp1l	2.0096	UHRF1 (ICBP90) binding protein 1-like
Nolc1	2.00955	nucleolar and coiled-body phosphoprotein 1
Zfp691	2.00904	zinc finger protein 691
LOC676974	2.00879	glucose-6-phosphate isomerase-like
D6Wsu116e	2.00776	DNA segment, Chr 6, Wayne State University 116, expressed
Yipf1	2.00731	Yip1 domain family, member 1
Pafah1b2	2.0073	platelet-activating factor acetylhydrolase, isoform 1b, subunit 2
Tor3a	2.00656	torsin family 3, member A
Ppp3cb	2.00623	protein phosphatase 3, catalytic subunit, beta isoform
Edn3	2.00361	endothelin 3
3110001I22Rik	2.00313	RIKEN cDNA 3110001I22 gene
LOC100502745	2.00308	hypothetical LOC100502745
Orai3	2.00247	ORAI calcium release-activated calcium modulator 3
Snapc3	2.00222	small nuclear RNA activating complex, polypeptide 3
Vps29	2.0003	vacuolar protein sorting 29 (S. pombe)
