# Supplementary material for: Modeling Alveolar Soft Part Sarcoma Unveils Novel Mechanisms of Metastasis
Source: Oxford University Press journal article supplement (doi:10.1158/0008-5472.can-16-2486), 2016-12-16
Supplement: 00085472can162486-sup-171611_1_supp_3721596_7fr179.xlsx [file 00085472can162486-sup-171611_1_supp_3721596_7fr179.xlsx]

## Sheet: Venn 830_AT3
Supplemental Table S4. Genes upregulated in eMCs expressing ASPSCR1-TFE3.
Gene Symbol	FC ([ASPL-TFE3 48h] vs [Vector 48h])	Gene Title
Synpr	20.2572	synaptoporin
Nppb	14.1241	natriuretic peptide type B
Blnk	12.8742	B-cell linker
Myh1	10.4873	myosin, heavy polypeptide 1, skeletal muscle, adult
Trim63	10.3789	tripartite motif-containing 63
Aqp11	10.281	aquaporin 11
0610010O12Rik	10.065	RIKEN cDNA 0610010O12 gene
Fabp3	7.29552	fatty acid binding protein 3, muscle and heart
Tm6sf1	6.49064	transmembrane 6 superfamily member 1
Prl2c2 /// Prl2c3 /// Prl2c4	6.31072	prolactin family 2, subfamily c, member 2 /// prolactin family 2, subfamily c, member 3 /// prolactin family 2, subfamily c, member 4
Fam134b	6.12027	family with sequence similarity 134, member B
Sycp3	6.03727	synaptonemal complex protein 3
Agt	5.85874	angiotensinogen (serpin peptidase inhibitor, clade A, member 8)
Gch1	5.82708	GTP cyclohydrolase 1
Tuba4a	5.77379	tubulin, alpha 4A
Klf15	5.44249	Kruppel-like factor 15
Tox2	5.41855	TOX high mobility group box family member 2
Pgam2	5.39775	phosphoglycerate mutase 2
Actn3	5.37756	actinin alpha 3
P2rx7	5.0261	purinergic receptor P2X, ligand-gated ion channel, 7
LOC100048884 /// Mup1 /// Mup10 /// Mup2 /// Mup3	4.88115	novel member of the major urinary protein (Mup) gene family /// major urinary protein 1 /// major urinary protein 10 /// major urinary protein 2 /// major urinary protein 3
Clstn2	4.82822	calsyntenin 2
Diras2	4.78466	DIRAS family, GTP-binding RAS-like 2
Adh1	4.75604	alcohol dehydrogenase 1 (class I)
1190002H23Rik	4.65867	RIKEN cDNA 1190002H23 gene
Smpx	4.62367	small muscle protein, X-linked
Bex4	4.48841	brain expressed gene 4
Trnp1	4.42428	TMF1-regulated nuclear protein 1
Ptgds	4.40695	prostaglandin D2 synthase (brain)
Egfl6	4.39517	EGF-like-domain, multiple 6
Casq1	4.36074	calsequestrin 1
LOC100048885 /// Mup1 /// Mup10 /// Mup12 /// Mup13 /// Mup15 /// Mup19 /// Mup2 /// Mup7 /// Mup8	4.35759	major urinary protein LOC100048885 /// major urinary protein 1 /// major urinary protein 10 /// major urinary protein 12 /// major urinary protein 13 /// major urinary protein 15 /// major urinary protein 19 /// major urinary protein 2 /// major urinary protein 7 /// major urinary protein 8
Phlda2	4.35258	pleckstrin homology-like domain, family A, member 2
Bdh2	4.31107	3-hydroxybutyrate dehydrogenase, type 2
Ildr2	4.21168	immunoglobulin-like domain containing receptor 2
Itgb1bp3	4.15882	integrin beta 1 binding protein 3
C1ql3	4.11487	C1q-like 3
Tnnt3	4.10211	troponin T3, skeletal, fast
Pdlim3	4.10097	PDZ and LIM domain 3
Ank2	4.06923	ankyrin 2, brain
Negr1	3.97259	neuronal growth regulator 1
Myh8	3.94863	myosin, heavy polypeptide 8, skeletal muscle, perinatal
Myl4	3.94373	myosin, light polypeptide 4
Ckmt2	3.94301	creatine kinase, mitochondrial 2
Pvalb	3.91158	parvalbumin
Mybpc1	3.85973	myosin binding protein C, slow-type
Myom2	3.83591	myomesin 2
Gm129	3.76438	predicted gene 129
Col19a1	3.7599	collagen, type XIX, alpha 1
Tnni2	3.7014	troponin I, skeletal, fast 2
Tnnc2	3.69223	troponin C2, fast
Mllt3	3.64468	myeloid/lymphoid or mixed-lineage leukemia (trithorax homolog, Drosophila); translocated to, 3
Apod	3.62941	apolipoprotein D
Lmcd1	3.6241	LIM and cysteine-rich domains 1
Rasgef1a	3.57896	RasGEF domain family, member 1A
Si	3.5381	silver
Casq2	3.50531	calsequestrin 2
Stx3	3.47813	syntaxin 3
Tbx1	3.46615	T-box 1
Ankrd2	3.44696	ankyrin repeat domain 2 (stretch responsive muscle)
Tnnc1	3.43084	troponin C, cardiac/slow skeletal
Tnnt1	3.37122	troponin T1, skeletal, slow
Enox1	3.36741	ecto-NOX disulfide-thiol exchanger 1
LOC100504883	3.34769	hypothetical protein LOC100504883
Bex2	3.32995	brain expressed X-linked 2
Fgf21	3.31808	fibroblast growth factor 21
Rab20	3.31427	RAB20, member RAS oncogene family
Rundc3b	3.2077	RUN domain containing 3B
Coro2b	3.19456	coronin, actin binding protein, 2B
Chl1	3.13217	cell adhesion molecule with homology to L1CAM
Gucy1b3	3.11766	guanylate cyclase 1, soluble, beta 3
Itgb1bp2	3.11242	integrin beta 1 binding protein 2
Mylpf	3.07005	myosin light chain, phosphorylatable, fast skeletal muscle
Tnni1	3.06768	troponin I, skeletal, slow 1
Lyz2	3.0673	lysozyme 2
Phactr1	3.05704	phosphatase and actin regulator 1
Aldh1l1 /// LOC100047937	3.04673	aldehyde dehydrogenase 1 family, member L1 /// 10-formyltetrahydrofolate dehydrogenase-like
Qpct	3.02847	glutaminyl-peptide cyclotransferase (glutaminyl cyclase)
Fgfr3	3.02659	fibroblast growth factor receptor 3
Mapkapk3	2.99713	mitogen-activated protein kinase-activated protein kinase 3
Abat	2.99129	4-aminobutyrate aminotransferase
Hebp1	2.95416	heme binding protein 1
Myoz2	2.94851	myozenin 2
Lrrn1	2.92013	leucine rich repeat protein 1, neuronal
Cacng1	2.91899	calcium channel, voltage-dependent, gamma subunit 1
A530053G22Rik	2.90592	RIKEN cDNA A530053G22 gene
Dpt	2.90213	dermatopontin
Tcn2	2.89139	transcobalamin 2
Synpo2l	2.88722	synaptopodin 2-like
Cables1	2.86834	CDK5 and Abl enzyme substrate 1
Chst11 /// Phactr1	2.84322	carbohydrate sulfotransferase 11 /// phosphatase and actin regulator 1
Myl1	2.83767	myosin, light polypeptide 1
Igfbp2	2.81037	insulin-like growth factor binding protein 2
Saa3	2.80053	serum amyloid A 3
Hist1h2bc	2.7877	histone cluster 1, H2bc
Orm1	2.78638	orosomucoid 1
Aldh1a7	2.78209	aldehyde dehydrogenase family 1, subfamily A7
Art1	2.7775	ADP-ribosyltransferase 1
Myh3	2.76557	myosin, heavy polypeptide 3, skeletal muscle, embryonic
Myom3	2.75371	myomesin family, member 3
Cox6a2	2.73278	cytochrome c oxidase, subunit VI a, polypeptide 2
Lgi2	2.72951	leucine-rich repeat LGI family, member 2
2900026A02Rik	2.72685	RIKEN cDNA 2900026A02 gene
Shmt1	2.72608	serine hydroxymethyltransferase 1 (soluble)
Murc	2.7254	muscle-related coiled-coil protein
Dmrtc1c /// Dmrtc1c2	2.72366	DMRT-like family C1c /// DMRT-like family C1c2
Apobec2	2.70561	apolipoprotein B mRNA editing enzyme, catalytic polypeptide 2
Got1	2.70543	glutamate oxaloacetate transaminase 1, soluble
Lyz1	2.70061	lysozyme 1
Trdn	2.69694	triadin
Ccl11	2.69644	chemokine (C-C motif) ligand 11
Cnr1	2.69084	cannabinoid receptor 1 (brain)
Mcf2l	2.67379	mcf.2 transforming sequence-like
Igf1	2.66453	insulin-like growth factor 1
Gpr146	2.66084	G protein-coupled receptor 146
Dbp	2.65923	D site albumin promoter binding protein
Srpk3	2.63543	serine/arginine-rich protein specific kinase 3
Chrdl1	2.62186	chordin-like 1
Lmod3	2.61912	leiomodin 3 (fetal)
Cpt1a	2.60722	carnitine palmitoyltransferase 1a, liver
Tyrobp	2.60176	TYRO protein tyrosine kinase binding protein
Cth	2.58811	cystathionase (cystathionine gamma-lyase)
Actn2	2.56641	actinin alpha 2
Synm	2.5482	synemin, intermediate filament protein
Pycard	2.53918	PYD and CARD domain containing
Mamdc2	2.53001	MAM domain containing 2
Tmem38b	2.50808	transmembrane protein 38B
Rora	2.47235	RAR-related orphan receptor alpha
Capn5	2.46664	calpain 5
Tgfb2	2.45985	transforming growth factor, beta 2
2500002B13Rik	2.45715	RIKEN cDNA 2500002B13 gene
Ahi1	2.45336	Abelson helper integration site 1
Asphd2	2.45335	aspartate beta-hydroxylase domain containing 2
Sc5d	2.45267	sterol-C5-desaturase (fungal ERG3, delta-5-desaturase) homolog (S. cerevisae)
Napa	2.42731	N-ethylmaleimide sensitive fusion protein attachment protein alpha
Tgoln1	2.39996	trans-golgi network protein
Ddt	2.39457	D-dopachrome tautomerase
Sgk3	2.38772	serum/glucocorticoid regulated kinase 3
Scn7a	2.38727	sodium channel, voltage-gated, type VII, alpha
Srl	2.3855	sarcalumenin
Taok3	2.38533	TAO kinase 3
Lonrf1	2.38386	LON peptidase N-terminal domain and ring finger 1
Slc16a12	2.37541	solute carrier family 16 (monocarboxylic acid transporters), member 12
Hsd17b11	2.36294	hydroxysteroid (17-beta) dehydrogenase 11
Xrcc5	2.36199	X-ray repair complementing defective repair in Chinese hamster cells 5
Kit	2.36093	kit oncogene
Lcorl	2.35183	ligand dependent nuclear receptor corepressor-like
Laptm5	2.34983	lysosomal-associated protein transmembrane 5
Tnnt2	2.34836	troponin T2, cardiac
Ctsf	2.34523	cathepsin F
Zfp709	2.3435	zinc finger protein 709
Ppp1r3c	2.33945	protein phosphatase 1, regulatory (inhibitor) subunit 3C
Stx11	2.33271	syntaxin 11
Asb13	2.31772	ankyrin repeat and SOCS box-containing 13
Hspb3	2.31772	heat shock protein 3
Nupr1	2.31735	nuclear protein 1
Mybph	2.31259	myosin binding protein H
Slc25a13	2.31046	solute carrier family 25 (mitochondrial carrier, adenine nucleotide translocator), member 13
LOC100048884 /// Mup1 /// Mup10 /// Mup2	2.30735	novel member of the major urinary protein (Mup) gene family /// major urinary protein 1 /// major urinary protein 10 /// major urinary protein 2
Lpin1	2.30726	lipin 1
Adssl1	2.30634	adenylosuccinate synthetase like 1
Rai2	2.29464	retinoic acid induced 2
Ctss	2.29226	cathepsin S
Spon1	2.29073	spondin 1, (f-spondin) extracellular matrix protein
Npnt	2.28705	nephronectin
Npl	2.28682	N-acetylneuraminate pyruvate lyase
Jsrp1	2.28668	junctional sarcoplasmic reticulum protein 1
Max	2.27692	Max protein
Hrc	2.27584	histidine rich calcium binding protein
Tnmd	2.27473	tenomodulin
Serpina3g	2.26695	serine (or cysteine) peptidase inhibitor, clade A, member 3G
Mb	2.26664	myoglobin
Zfp667	2.26241	zinc finger protein 667
Csrp3	2.26119	cysteine and glycine-rich protein 3
Chrng	2.25768	cholinergic receptor, nicotinic, gamma polypeptide
Slc7a11	2.25381	solute carrier family 7 (cationic amino acid transporter, y+ system), member 11
Coro1a	2.25342	coronin, actin binding protein 1A
Tbcel	2.25331	tubulin folding cofactor E-like
Cpa3	2.25278	carboxypeptidase A3, mast cell
Atp6v1b2	2.24969	ATPase, H+ transporting, lysosomal V1 subunit B2
Rab40b	2.23828	Rab40b, member RAS oncogene family
Fhod3	2.23738	formin homology 2 domain containing 3
Ttn	2.23664	titin
Shisa2	2.23536	shisa homolog 2 (Xenopus laevis)
septin 4	2.23456	septin 4
Fcgr3	2.23186	Fc receptor, IgG, low affinity III
Acta1	2.2318	actin, alpha 1, skeletal muscle
Chodl	2.22919	chondrolectin
Il17d	2.22101	interleukin 17D
Coro7	2.21997	coronin 7
Fgl2	2.21886	fibrinogen-like protein 2
Ccl20	2.21822	chemokine (C-C motif) ligand 20
Nrsn1	2.21317	neurensin 1
Gm11277 /// Gm13646 /// Hist1h2bc /// Hist1h2be /// Hist1h2bl /// Hist1h2bm /// Hist1h2bp	2.21275	predicted gene 11277 /// predicted gene 13646 /// histone cluster 1, H2bc /// histone cluster 1, H2be /// histone cluster 1, H2bl /// histone cluster 1, H2bm /// histone cluster 1, H2bp
Col25a1	2.21164	collagen, type XXV, alpha 1
Mgll	2.21036	monoglyceride lipase
Neurl2	2.21003	neuralized-like 2 (Drosophila)
Sypl	2.20207	synaptophysin-like protein
Cys1	2.20147	cystin 1
Dusp3	2.19903	dual specificity phosphatase 3 (vaccinia virus phosphatase VH1-related)
Cln8	2.19887	ceroid-lipofuscinosis, neuronal 8
Ckm	2.19406	creatine kinase, muscle
Gem	2.19338	GTP binding protein (gene overexpressed in skeletal muscle)
Tmem182	2.19216	transmembrane protein 182
Myom1	2.18711	myomesin 1
Rasl11b	2.17677	RAS-like, family 11, member B
Galnt12	2.17573	UDP-N-acetyl-alpha-D-galactosamine:polypeptide N-acetylgalactosaminyltransferase 12
Qdpr	2.17468	quinoid dihydropteridine reductase
Otop1	2.17232	otopetrin 1
Prom1	2.16357	prominin 1
N4bp2l1	2.16352	NEDD4 binding protein 2-like 1
Gabarapl1	2.16219	gamma-aminobutyric acid (GABA) A receptor-associated protein-like 1
Atp6ap2	2.16005	ATPase, H+ transporting, lysosomal accessory protein 2
Lgmn	2.15607	legumain
2810468N07Rik	2.15167	RIKEN cDNA 2810468N07 gene
Dner	2.14983	delta/notch-like EGF-related receptor
Mapk8ip1	2.14641	mitogen-activated protein kinase 8 interacting protein 1
C3	2.14614	complement component 3
Tceal7	2.14581	transcription elongation factor A (SII)-like 7
Slc31a2	2.14502	solute carrier family 31, member 2
Lmod2	2.14494	leiomodin 2 (cardiac)
Klhl30	2.14114	kelch-like 30 (Drosophila)
Tmem38a	2.14107	transmembrane protein 38A
Fam176a	2.1406	family with sequence similarity 176, member A
Tmem181a /// Tmem181b-ps	2.13909	transmembrane protein 181A /// transmembrane protein 181B, pseudogene
Dhrs7c	2.13757	dehydrogenase/reductase (SDR family) member 7C
Cd40	2.13465	CD40 antigen
Atp6v1f	2.13388	ATPase, H+ transporting, lysosomal V1 subunit F
Gm7325	2.13384	predicted gene 7325
Rspo3	2.13083	R-spondin 3 homolog (Xenopus laevis)
Ass1	2.13054	argininosuccinate synthetase 1
Hlf	2.12631	hepatic leukemia factor
Sh3bgrl2	2.12551	SH3 domain binding glutamic acid-rich protein like 2
Rbp4	2.11946	retinol binding protein 4, plasma
Ces1d	2.11928	carboxylesterase 1D
1110059G02Rik	2.11916	RIKEN cDNA 1110059G02 gene
Ppp1r3b	2.11596	protein phosphatase 1, regulatory (inhibitor) subunit 3B
Tbc1d10a	2.11011	TBC1 domain family, member 10a
Acsl3	2.10383	acyl-CoA synthetase long-chain family member 3
Gstt2	2.10252	glutathione S-transferase, theta 2
Acsl1	2.10032	acyl-CoA synthetase long-chain family member 1
Cav3	2.09698	caveolin 3
Adam33	2.09649	a disintegrin and metallopeptidase domain 33
Gas6	2.09639	growth arrest specific 6
Lonrf2	2.09018	LON peptidase N-terminal domain and ring finger 2
Fbxo32	2.08892	F-box protein 32
Gp49a /// Lilrb4	2.08621	glycoprotein 49 A /// leukocyte immunoglobulin-like receptor, subfamily B, member 4
Fcer1g	2.07911	Fc receptor, IgE, high affinity I, gamma polypeptide
Sgip1	2.07839	SH3-domain GRB2-like (endophilin) interacting protein 1
Olfml1	2.07695	olfactomedin-like 1
Tmem8c	2.07329	transmembrane protein 8C
Prkd1	2.07249	protein kinase D1
Zdhhc14	2.07146	zinc finger, DHHC domain containing 14
Vps35	2.06706	vacuolar protein sorting 35
Thrsp	2.06673	thyroid hormone responsive SPOT14 homolog (Rattus)
Atp6v1a	2.06359	ATPase, H+ transporting, lysosomal V1 subunit A
Ckb	2.05432	creatine kinase, brain
Hfe2	2.05345	hemochromatosis type 2 (juvenile) (human homolog)
Hexb	2.05343	hexosaminidase B
Gabarapl2	2.05191	gamma-aminobutyric acid (GABA) A receptor-associated protein-like 2
Tollip	2.04536	toll interacting protein
Asb5	2.04419	ankyrin repeat and SOCs box-containing 5
Chpt1	2.04257	choline phosphotransferase 1
Aldoc	2.04253	aldolase C, fructose-bisphosphate
Cma1	2.04108	chymase 1, mast cell
Frrs1	2.03516	ferric-chelate reductase 1
Apoe	2.03188	apolipoprotein E
Nceh1	2.03094	arylacetamide deacetylase-like 1
Cd24a	2.02333	CD24a antigen
Rpia	2.0213	ribose 5-phosphate isomerase A
Mfsd7c	2.02034	major facilitator superfamily domain containing 7C
Agpat9	2.01807	1-acylglycerol-3-phosphate O-acyltransferase 9
Wnt16	2.01531	wingless-related MMTV integration site 16
Tm7sf2	2.01485	transmembrane 7 superfamily member 2
Eno3	2.01477	enolase 3, beta muscle
Unc45b	2.00552	unc-45 homolog B (C. elegans)
Car9	1.9998	carbonic anhydrase 9
Plbd1	1.99851	phospholipase B domain containing 1
Hist2h2aa1 /// Hist2h2aa2 /// Hist2h2ac /// Hist2h3c1	1.99824	histone cluster 2, H2aa1 /// histone cluster 2, H2aa2 /// histone cluster 2, H2ac /// histone cluster 2, H3c1
Aldh9a1	1.99442	aldehyde dehydrogenase 9, subfamily A1
Cxcl12	1.99294	chemokine (C-X-C motif) ligand 12
5133401N09Rik	1.99053	RIKEN cDNA 5133401N09 gene
St3gal6	1.99024	ST3 beta-galactoside alpha-2,3-sialyltransferase 6
LOC100503436 /// Prkg1	1.98878	hypothetical LOC100503436 /// protein kinase, cGMP-dependent, type I
Hist1h1c	1.9882	histone cluster 1, H1c
Fgd4	1.9878	FYVE, RhoGEF and PH domain containing 4
Ankrd12	1.98692	ankyrin repeat domain 12
3110002H16Rik	1.98528	RIKEN cDNA 3110002H16 gene
Ifitm1	1.98214	interferon induced transmembrane protein 1
Atp6v1e1	1.98041	ATPase, H+ transporting, lysosomal V1 subunit E1
Ndrg1	1.97924	N-myc downstream regulated gene 1
Plek	1.97649	pleckstrin
Fam20c	1.97248	family with sequence similarity 20, member C
LOC100504698	1.97198	hypothetical LOC100504698
Armc6	1.96963	armadillo repeat containing 6
LOC100502591	1.9673	hypothetical LOC100502591
Gbe1	1.96484	glucan (1,4-alpha-), branching enzyme 1
G0s2	1.96408	G0/G1 switch gene 2
Smpdl3a	1.96399	sphingomyelin phosphodiesterase, acid-like 3A
Amdhd2	1.96389	amidohydrolase domain containing 2
Rab15	1.96121	RAB15, member RAS oncogene family
Serpina3n	1.95294	serine (or cysteine) peptidase inhibitor, clade A, member 3N
Snca	1.95252	synuclein, alpha
Slc29a3	1.95237	solute carrier family 29 (nucleoside transporters), member 3
Hephl1	1.95065	hephaestin-like 1
Tpsab1	1.95035	tryptase alpha/beta 1
Idua	1.94931	Iduronidase, alpha-L-
P2rx4	1.94632	purinergic receptor P2X, ligand-gated ion channel 4
Efhd2	1.94176	EF hand domain containing 2
Ccdc91	1.94173	coiled-coil domain containing 91
Scamp1	1.93708	secretory carrier membrane protein 1
Oxct1	1.93586	3-oxoacid CoA transferase 1
Mypn	1.93572	myopalladin
C1s	1.9356	complement component 1, s subcomponent
Ntrk2	1.93305	neurotrophic tyrosine kinase, receptor, type 2
Stk10	1.93071	serine/threonine kinase 10
Rab32	1.9288	RAB32, member RAS oncogene family
Nrap	1.92852	nebulin-related anchoring protein
Ctsc	1.92738	cathepsin C
Slc45a3	1.92443	solute carrier family 45, member 3
Synpo2	1.92331	synaptopodin 2
Homer2	1.92039	homer homolog 2 (Drosophila)
Ccbl2	1.91997	cysteine conjugate-beta lyase 2
A030009H04Rik	1.91884	RIKEN cDNA A030009H04 gene
Slc2a6	1.91815	solute carrier family 2 (facilitated glucose transporter), member 6
Limch1	1.91553	LIM and calponin homology domains 1
Ablim1	1.914	actin-binding LIM protein 1
Maf	1.91207	avian musculoaponeurotic fibrosarcoma (v-maf) AS42 oncogene homolog
Stc2	1.91046	stanniocalcin 2
Ccdc132	1.9097	coiled-coil domain containing 132
Plekhf2	1.90964	pleckstrin homology domain containing, family F (with FYVE domain) member 2
5730508B09Rik	1.90961	RIKEN cDNA 5730508B09 gene
Mylk4	1.906	myosin light chain kinase family, member 4
Clec4d	1.90412	C-type lectin domain family 4, member d
Plcg2	1.90345	phospholipase C, gamma 2
Plxdc1	1.9025	plexin domain containing 1
Il1rn	1.90245	interleukin 1 receptor antagonist
Vps13a	1.90161	vacuolar protein sorting 13A (yeast)
Acaa2	1.89899	acetyl-Coenzyme A acyltransferase 2 (mitochondrial 3-oxoacyl-Coenzyme A thiolase)
Rnf128	1.89514	ring finger protein 128
F630110N24Rik	1.89142	RIKEN cDNA F630110N24 gene
Sfrp1	1.89073	secreted frizzled-related protein 1
Vps29	1.88873	vacuolar protein sorting 29 (S. pombe)
Grina	1.88631	glutamate receptor, ionotropic, N-methyl D-aspartate-associated protein 1 (glutamate binding)
Gnai1	1.88602	guanine nucleotide binding protein (G protein), alpha inhibiting 1
Appl2	1.88373	adaptor protein, phosphotyrosine interaction, PH domain and leucine zipper containing 2
Tmem170b	1.88258	transmembrane protein 170B
Mpeg1	1.87973	macrophage expressed gene 1
Atp8a1	1.87954	ATPase, aminophospholipid transporter (APLT), class I, type 8A, member 1
Sh3bp2	1.8794	SH3-domain binding protein 2
Cpeb2	1.87726	cytoplasmic polyadenylation element binding protein 2
Myo6	1.87504	myosin VI
Col4a3bp	1.87362	collagen, type IV, alpha 3 (Goodpasture antigen) binding protein
Ankhd1	1.87325	ankyrin repeat and KH domain containing 1
Abhd6	1.87269	abhydrolase domain containing 6
2010011I20Rik	1.87164	RIKEN cDNA 2010011I20 gene
Polr3c	1.87121	polymerase (RNA) III (DNA directed) polypeptide C
B3galt2	1.87035	UDP-Gal:betaGlcNAc beta 1,3-galactosyltransferase, polypeptide 2
Pde4dip	1.87026	phosphodiesterase 4D interacting protein (myomegalin)
Manba	1.87015	mannosidase, beta A, lysosomal
Kbtbd10	1.86545	kelch repeat and BTB (POZ) domain containing 10
Col9a3	1.86541	collagen, type IX, alpha 3
Ugp2	1.86378	UDP-glucose pyrophosphorylase 2
Atxn3	1.86278	ataxin 3
Sirt1	1.86242	sirtuin 1 (silent mating type information regulation 2, homolog) 1 (S. cerevisiae)
P4htm	1.85982	prolyl 4-hydroxylase, transmembrane (endoplasmic reticulum)
Angpt1	1.85832	angiopoietin 1
Arhgap12	1.85822	Rho GTPase activating protein 12
Snx10	1.85724	sorting nexin 10
Ahcyl2	1.85496	S-adenosylhomocysteine hydrolase-like 2
Brp44l /// LOC100503245	1.85403	brain protein 44-like /// brain protein 44-like protein-like
Gigyf2	1.85385	GRB10 interacting GYF protein 2
Car6	1.85362	carbonic anhydrase 6
Rgs7bp	1.8521	regulator of G-protein signalling 7 binding protein
Specc1	1.85205	sperm antigen with calponin homology and coiled-coil domains 1
Eln	1.84985	elastin
Cdh10	1.84641	cadherin 10
Stac3	1.84618	SH3 and cysteine rich domain 3
Ube2b	1.84449	ubiquitin-conjugating enzyme E2B, RAD6 homology (S. cerevisiae)
Plk3	1.84085	polo-like kinase 3 (Drosophila)
Tmtc1	1.83859	transmembrane and tetratricopeptide repeat containing 1
Atp6v1g1	1.83754	ATPase, H+ transporting, lysosomal V1 subunit G1
Myo1d	1.83575	myosin ID
Hist2h3c2-ps	1.83535	histone cluster 2, H3c2, pseudogene
Map1lc3b	1.83249	microtubule-associated protein 1 light chain 3 beta
Arhgef6	1.82675	Rac/Cdc42 guanine nucleotide exchange factor (GEF) 6
Aspa	1.82618	aspartoacylase
Pawr	1.82475	PRKC, apoptosis, WT1, regulator
Osgin2	1.82466	oxidative stress induced growth inhibitor family member 2
Hspb8	1.81943	heat shock protein 8
Ccny	1.81859	cyclin Y
Kidins220	1.81735	kinase D-interacting substrate 220
Pcsk5	1.81434	proprotein convertase subtilisin/kexin type 5
Trim54	1.81268	tripartite motif-containing 54
Dock10	1.8119	dedicator of cytokinesis 10
Gatm	1.81061	glycine amidinotransferase (L-arginine:glycine amidinotransferase)
Stk17b	1.80838	serine/threonine kinase 17b (apoptosis-inducing)
Aard	1.80484	alanine and arginine rich domain containing protein
Ccdc141	1.80433	coiled-coil domain containing 141
Maob	1.80355	monoamine oxidase B
Atl2	1.80174	atlastin GTPase 2
Rps6ka1	1.80071	ribosomal protein S6 kinase polypeptide 1
Mafb	1.79898	v-maf musculoaponeurotic fibrosarcoma oncogene family, protein B (avian)
Nnmt	1.79897	nicotinamide N-methyltransferase
Cib2	1.79652	calcium and integrin binding family member 2
1110002E22Rik	1.79609	RIKEN cDNA 1110002E22 gene
Cap2	1.79545	CAP, adenylate cyclase-associated protein, 2 (yeast)
Hes6	1.79375	hairy and enhancer of split 6 (Drosophila)
Sirpa	1.79305	signal-regulatory protein alpha
Cdo1	1.79279	cysteine dioxygenase 1, cytosolic
Bmf	1.79023	BCL2 modifying factor
Ykt6	1.79001	YKT6 homolog (S. Cerevisiae)
LOC100504040	1.78722	hypothetical LOC100504040
Cds1	1.78647	CDP-diacylglycerol synthase 1
Ppcs	1.78623	phosphopantothenoylcysteine synthetase
Pmvk	1.78358	phosphomevalonate kinase
Ubn1	1.78156	ubinuclein 1
Hspb2	1.78147	heat shock protein 2
Gfra1	1.77923	glial cell line derived neurotrophic factor family receptor alpha 1
1110059M19Rik	1.77889	RIKEN cDNA 1110059M19 gene
Fam195a	1.77768	family with sequence similarity 195, member A
Acss2	1.7768	acyl-CoA synthetase short-chain family member 2
Kif21a	1.77544	kinesin family member 21A
Cobl	1.766	cordon-bleu
Reln	1.76328	reelin
Arl8b	1.76256	ADP-ribosylation factor-like 8B
Higd1a	1.76027	HIG1 domain family, member 1A
Dbndd1	1.75682	dysbindin (dystrobrevin binding protein 1) domain containing 1
Acaa1b	1.7563	acetyl-Coenzyme A acyltransferase 1B
Hist1h2bp	1.75507	histone cluster 1, H2bp
Msr1	1.75312	macrophage scavenger receptor 1
Clec3b	1.75171	C-type lectin domain family 3, member b
Adhfe1	1.75169	alcohol dehydrogenase, iron containing, 1
Zfand5	1.75095	zinc finger, AN1-type domain 5
Neb	1.75067	nebulin
Arpp21	1.75005	cyclic AMP-regulated phosphoprotein, 21
Thoc1	1.75005	THO complex 1
Myf5	1.74884	myogenic factor 5
Hist2h3c1	1.74769	histone cluster 2, H3c1
Fbxl3	1.74768	F-box and leucine-rich repeat protein 3
Slc35f5	1.747	solute carrier family 35, member F5
Fzd5	1.74302	frizzled homolog 5 (Drosophila)
Bach1	1.74301	BTB and CNC homology 1
1110028C15Rik	1.7428	RIKEN cDNA 1110028C15 gene
Pdcd2l	1.74152	programmed cell death 2-like
Lamp2	1.73908	lysosomal-associated membrane protein 2
Chfr	1.73882	checkpoint with forkhead and ring finger domains
Rnf130	1.73802	ring finger protein 130
Als2	1.7361	amyotrophic lateral sclerosis 2 (juvenile) homolog (human)
Abhd1	1.73427	abhydrolase domain containing 1
Phf15	1.73378	PHD finger protein 15
Reep1	1.7336	receptor accessory protein 1
Pdlim5	1.73268	PDZ and LIM domain 5
Cmbl	1.73264	carboxymethylenebutenolidase-like (Pseudomonas)
Atp11a	1.73196	ATPase, class VI, type 11A
Gm13889	1.73149	predicted gene 13889
Tmbim4	1.73126	transmembrane BAX inhibitor motif containing 4
Slc31a1	1.7311	solute carrier family 31, member 1
Nmnat1	1.73035	nicotinamide nucleotide adenylyltransferase 1
H47	1.72992	histocompatibility 47
Sgcg	1.72893	sarcoglycan, gamma (dystrophin-associated glycoprotein)
Gyg	1.72744	glycogenin
Gm6484	1.72642	predicted gene 6484
Abca3	1.7262	ATP-binding cassette, sub-family A (ABC1), member 3
2310002L09Rik	1.72573	RIKEN cDNA 2310002L09 gene
Hsd17b12	1.72511	hydroxysteroid (17-beta) dehydrogenase 12
Ms4a6b	1.72483	membrane-spanning 4-domains, subfamily A, member 6B
Cgnl1	1.7246	cingulin-like 1
Apc	1.72382	adenomatosis polyposis coli
Sh3bgr	1.72154	SH3-binding domain glutamic acid-rich protein
1110003E01Rik	1.71915	RIKEN cDNA 1110003E01 gene
Rtn2	1.71694	reticulon 2 (Z-band associated protein)
Prkx	1.71528	protein kinase, X-linked
Atp6v0e2	1.71516	ATPase, H+ transporting, lysosomal V0 subunit E2
Abi3bp	1.71487	ABI gene family, member 3 (NESH) binding protein
D4Wsu53e	1.71432	DNA segment, Chr 4, Wayne State University 53, expressed
2610019F03Rik	1.71397	RIKEN cDNA 2610019F03 gene
Fibin	1.71311	fin bud initiation factor homolog (zebrafish)
B4galt7	1.71214	xylosylprotein beta1,4-galactosyltransferase, polypeptide 7 (galactosyltransferase I)
Sypl2	1.71167	synaptophysin-like 2
Rnf13	1.7104	ring finger protein 13
Hpgd	1.71017	hydroxyprostaglandin dehydrogenase 15 (NAD)
Hsd11b1	1.70894	hydroxysteroid 11-beta dehydrogenase 1
Fahd1	1.7087	fumarylacetoacetate hydrolase domain containing 1
Cyfip2	1.70756	cytoplasmic FMR1 interacting protein 2
Zfyve21	1.70701	zinc finger, FYVE domain containing 21
Ramp1	1.70591	receptor (calcitonin) activity modifying protein 1
Rnasel	1.70547	ribonuclease L (2', 5'-oligoisoadenylate synthetase-dependent)
Sco2	1.7045	SCO cytochrome oxidase deficient homolog 2 (yeast)
Cldn4	1.70257	claudin 4
Mlph	1.7023	melanophilin
Nol7	1.70103	nucleolar protein 7
Nr4a3	1.69979	nuclear receptor subfamily 4, group A, member 3
Emb	1.69939	embigin
Srpx	1.69897	sushi-repeat-containing protein
Znrf2	1.69835	zinc and ring finger 2
Zbed4	1.69758	zinc finger, BED domain containing 4
Dmrt2	1.69501	doublesex and mab-3 related transcription factor 2
4930506M07Rik	1.695	RIKEN cDNA 4930506M07 gene
Tmem178	1.69395	transmembrane protein 178
Hsbp1	1.69309	heat shock factor binding protein 1
Eps8	1.69269	epidermal growth factor receptor pathway substrate 8
Stx7	1.68724	syntaxin 7
Ryr1	1.68687	ryanodine receptor 1, skeletal muscle
Cntn1	1.68643	contactin 1
Slc2a4	1.68634	solute carrier family 2 (facilitated glucose transporter), member 4
Sema3e	1.68554	sema domain, immunoglobulin domain (Ig), short basic domain, secreted, (semaphorin) 3E
Echdc2	1.68483	enoyl Coenzyme A hydratase domain containing 2
Pkia	1.68481	protein kinase inhibitor, alpha
Tmem41b	1.68201	transmembrane protein 41B
Sdcbp	1.68167	syndecan binding protein
Asah1	1.68098	N-acylsphingosine amidohydrolase 1
Kng1	1.68085	kininogen 1
Ptplad1	1.68063	protein tyrosine phosphatase-like A domain containing 1
0910001L09Rik	1.67948	RIKEN cDNA 0910001L09 gene
Kbtbd5	1.67848	kelch repeat and BTB (POZ) domain containing 5
Aspn	1.6765	asporin
Cnot4	1.67437	CCR4-NOT transcription complex, subunit 4
Tgm2	1.67391	transglutaminase 2, C polypeptide
Fdps	1.67219	farnesyl diphosphate synthetase
Twf2	1.67138	twinfilin, actin-binding protein, homolog 2 (Drosophila)
Cisd1	1.67059	CDGSH iron sulfur domain 1
Daglb	1.67034	diacylglycerol lipase, beta
1700113I22Rik /// Aarsd1	1.669	RIKEN cDNA 1700113I22 gene /// alanyl-tRNA synthetase domain containing 1
1810013L24Rik	1.66891	RIKEN cDNA 1810013L24 gene
Fam171b	1.66763	family with sequence similarity 171, member B
4933431E20Rik	1.66636	RIKEN cDNA 4933431E20 gene
Prlr	1.66508	prolactin receptor
Cndp2	1.66364	CNDP dipeptidase 2 (metallopeptidase M20 family)
Myot	1.66045	myotilin
2010320M18Rik	1.65902	RIKEN cDNA 2010320M18 gene
6330409N04Rik	1.65848	RIKEN cDNA 6330409N04 gene
Parm1	1.65768	prostate androgen-regulated mucin-like protein 1
Jtb	1.65724	jumping translocation breakpoint
Serinc5	1.65699	serine incorporator 5
Ppip5k1	1.65389	diphosphoinositol pentakisphosphate kinase 1
Acox1	1.65325	acyl-Coenzyme A oxidase 1, palmitoyl
Sox2	1.65276	SRY-box containing gene 2
Rbm19	1.65176	RNA binding motif protein 19
Dpep1	1.6512	dipeptidase 1 (renal)
Nfkbib	1.6504	nuclear factor of kappa light polypeptide gene enhancer in B-cells inhibitor, beta
Avpi1	1.6503	arginine vasopressin-induced 1
Arfrp1	1.6503	ADP-ribosylation factor related protein 1
Slc16a6	1.64889	solute carrier family 16 (monocarboxylic acid transporters), member 6
Fam46a	1.64739	family with sequence similarity 46, member A
Tmem20	1.64729	transmembrane protein 20
Mef2c	1.64644	myocyte enhancer factor 2C
Pcsk9	1.64621	proprotein convertase subtilisin/kexin type 9
Nt5dc3	1.64607	5'-nucleotidase domain containing 3
Synj1	1.64537	synaptojanin 1
BC151093 /// Ear1 /// Ear12 /// Ear2 /// Ear3	1.64535	cDNA sequence BC151093 /// eosinophil-associated, ribonuclease A family, member 1 /// eosinophil-associated, ribonuclease A family, member 12 /// eosinophil-associated, ribonuclease A family, member 2 /// eosinophil-associated, ribonuclease A family, member 3
Fdx1	1.64497	ferredoxin 1
Alox5ap	1.64486	arachidonate 5-lipoxygenase activating protein
Enpp2	1.64469	ectonucleotide pyrophosphatase/phosphodiesterase 2
Mrc1	1.64435	mannose receptor, C type 1
Gstm2	1.64333	glutathione S-transferase, mu 2
Tubb2a-ps2 /// Tubb2b	1.64249	tubulin, beta 2a, pseudogene 2 /// tubulin, beta 2B
Lrrc39	1.64171	leucine rich repeat containing 39
Selenbp1	1.6416	selenium binding protein 1
Slc12a6	1.64129	solute carrier family 12, member 6
Tprkb	1.64109	Tp53rk binding protein
Herpud1	1.64015	homocysteine-inducible, endoplasmic reticulum stress-inducible, ubiquitin-like domain member 1
Ttc1	1.63992	tetratricopeptide repeat domain 1
Klhl24	1.63848	kelch-like 24 (Drosophila)
Cpeb3	1.63807	cytoplasmic polyadenylation element binding protein 3
Gpr120	1.63703	G protein-coupled receptor 120
Stx4a	1.63616	syntaxin 4A (placental)
Gdpd1	1.6361	glycerophosphodiester phosphodiesterase domain containing 1
Commd6	1.63555	COMM domain containing 6
Faf1	1.6351	Fas-associated factor 1
Araf	1.6336	v-raf murine sarcoma 3611 viral oncogene homolog
Asb1	1.63331	ankyrin repeat and SOCS box-containing 1
Entpd2	1.63307	ectonucleoside triphosphate diphosphohydrolase 2
Bckdhb	1.63229	branched chain ketoacid dehydrogenase E1, beta polypeptide
Ttc39b	1.63187	tetratricopeptide repeat domain 39B
Mmd	1.63146	monocyte to macrophage differentiation-associated
Gnptab	1.63093	N-acetylglucosamine-1-phosphate transferase, alpha and beta subunits
2410001C21Rik	1.63066	RIKEN cDNA 2410001C21 gene
Abcc9	1.63026	ATP-binding cassette, sub-family C (CFTR/MRP), member 9
2310043M15Rik	1.63	RIKEN cDNA 2310043M15 gene
B3gnt2 /// Commd1	1.62945	UDP-GlcNAc:betaGal beta-1,3-N-acetylglucosaminyltransferase 2 /// COMM domain containing 1
Mosc2	1.62913	MOCO sulphurase C-terminal domain containing 2
Ddo	1.62865	D-aspartate oxidase
Tuba8	1.62741	tubulin, alpha 8
2810432L12Rik	1.6273	RIKEN cDNA 2810432L12 gene
Hspa12a	1.6266	heat shock protein 12A
Abcg1	1.62659	ATP-binding cassette, sub-family G (WHITE), member 1
Lama1	1.62643	laminin, alpha 1
Ptn	1.62621	pleiotrophin
Mpv17	1.62501	MpV17 mitochondrial inner membrane protein
Cyp2j6	1.62135	cytochrome P450, family 2, subfamily j, polypeptide 6
Tlr2	1.61995	toll-like receptor 2
Xpc	1.61985	xeroderma pigmentosum, complementation group C
Insl6	1.61984	insulin-like 6
Pcyox1	1.61942	prenylcysteine oxidase 1
Cybb	1.61866	cytochrome b-245, beta polypeptide
Syde2	1.61854	synapse defective 1, Rho GTPase, homolog 2 (C. elegans)
Gbp10 /// Mpa2l	1.61831	guanylate-binding protein 10 /// macrophage activation 2 like
D430019H16Rik	1.61778	RIKEN cDNA D430019H16 gene
Trim37	1.61711	tripartite motif-containing 37
1700020C11Rik	1.6167	RIKEN cDNA 1700020C11 gene
Bid	1.6167	BH3 interacting domain death agonist
Eya1	1.61547	eyes absent 1 homolog (Drosophila)
Clec4n	1.61328	C-type lectin domain family 4, member n
S100b	1.61211	S100 protein, beta polypeptide, neural
Fzd10	1.61152	frizzled homolog 10 (Drosophila)
4930526I15Rik	1.60942	RIKEN cDNA 4930526I15 gene
Ldhb	1.60911	lactate dehydrogenase B
Rab1	1.60862	RAB1, member RAS oncogene family
Hal	1.60859	histidine ammonia lyase
Bdh1	1.6085	3-hydroxybutyrate dehydrogenase, type 1
Gda	1.60823	guanine deaminase
Bpgm	1.60745	2,3-bisphosphoglycerate mutase
Acat2 /// Acat3	1.60639	acetyl-Coenzyme A acetyltransferase 2 /// acetyl-Coenzyme A acetyltransferase 3
Samd8	1.60622	sterile alpha motif domain containing 8
Pex11a	1.60605	peroxisomal biogenesis factor 11 alpha
Cnnm2	1.6058	cyclin M2
Lap3	1.60526	leucine aminopeptidase 3
Ebp	1.60412	phenylalkylamine Ca2+ antagonist (emopamil) binding protein
Plcl2	1.60393	phospholipase C-like 2
Rabep1	1.60385	rabaptin, RAB GTPase binding effector protein 1
1810020D17Rik	1.6036	RIKEN cDNA 1810020D17 gene
Tspan33	1.60344	tetraspanin 33
C1qtnf3	1.60306	C1q and tumor necrosis factor related protein 3
Me1	1.60267	malic enzyme 1, NADP(+)-dependent, cytosolic
Tmem64	1.60256	transmembrane protein 64
Stard5	1.60208	StAR-related lipid transfer (START) domain containing 5
Dnmt3b	1.6014	DNA methyltransferase 3B
Fcho2	1.59922	FCH domain only 2
Hbxip	1.59908	hepatitis B virus x interacting protein
Cd53	1.59905	CD53 antigen
Cbr1	1.59896	carbonyl reductase 1
Slc35a3	1.59866	solute carrier family 35 (UDP-N-acetylglucosamine (UDP-GlcNAc) transporter), member 3
Ppp1r15a	1.59864	protein phosphatase 1, regulatory (inhibitor) subunit 15A
Acsl6	1.59702	acyl-CoA synthetase long-chain family member 6
Clk4	1.59626	CDC like kinase 4
Elmod2	1.59613	ELMO domain containing 2
Dcaf12l1	1.59588	DDB1 and CUL4 associated factor 12-like 1
Phospho2	1.59501	phosphatase, orphan 2
Morn2	1.5949	MORN repeat containing 2
Fermt3	1.59302	fermitin family homolog 3 (Drosophila)
Atp2a1	1.59295	ATPase, Ca++ transporting, cardiac muscle, fast twitch 1
Tom1l1	1.59237	target of myb1-like 1 (chicken)
Shb	1.59226	src homology 2 domain-containing transforming protein B
Enpep	1.5922	glutamyl aminopeptidase
Cd48	1.5913	CD48 antigen
Rab24	1.59039	RAB24, member RAS oncogene family
D4Bwg0951e	1.58996	DNA segment, Chr 4, Brigham & Women's Genetics 0951 expressed
Gdpd2	1.58947	glycerophosphodiester phosphodiesterase domain containing 2
Sphk1	1.58896	sphingosine kinase 1
Dnmt3a	1.58888	DNA methyltransferase 3A
5730469M10Rik	1.58867	RIKEN cDNA 5730469M10 gene
Ube2d3	1.58845	ubiquitin-conjugating enzyme E2D 3 (UBC4/5 homolog, yeast)
Efna3	1.58829	ephrin A3
Ppp1r14c	1.58696	protein phosphatase 1, regulatory (inhibitor) subunit 14c
Nip7	1.58684	nuclear import 7 homolog (S. cerevisiae)
Nup210	1.58677	nucleoporin 210
Mosc1	1.58647	MOCO sulphurase C-terminal domain containing 1
Tmem135	1.58585	transmembrane protein 135
Mylk	1.58558	myosin, light polypeptide kinase
Cul5	1.58382	cullin 5
Slc35a5	1.58278	solute carrier family 35, member A5
Skap2	1.58182	src family associated phosphoprotein 2
Atg12	1.57939	autophagy-related 12 (yeast)
Dhx32	1.57927	DEAH (Asp-Glu-Ala-His) box polypeptide 32
Iah1	1.57922	isoamyl acetate-hydrolyzing esterase 1 homolog (S. cerevisiae)
Snx2	1.57921	sorting nexin 2
Hopx	1.57762	HOP homeobox
Gtl3	1.57694	gene trap locus 3
Pla2g7	1.57638	phospholipase A2, group VII (platelet-activating factor acetylhydrolase, plasma)
Psmd9	1.57395	proteasome (prosome, macropain) 26S subunit, non-ATPase, 9
Acy1	1.57344	aminoacylase 1
Agpat2	1.57242	1-acylglycerol-3-phosphate O-acyltransferase 2 (lysophosphatidic acid acyltransferase, beta)
Pitx2	1.57171	paired-like homeodomain transcription factor 2
A2ld1	1.5717	AIG2-like domain 1
Plin2	1.57163	perilipin 2
Plscr1	1.5714	phospholipid scramblase 1
Acly	1.57107	ATP citrate lyase
Golga4	1.57074	golgi autoantigen, golgin subfamily a, 4
Ifrd1	1.5707	interferon-related developmental regulator 1
Wrb	1.57059	tryptophan rich basic protein
Chrna1	1.56996	cholinergic receptor, nicotinic, alpha polypeptide 1 (muscle)
Rpl39l	1.56985	ribosomal protein L39-like
Tln1	1.56962	talin 1
Coq5	1.56912	coenzyme Q5 homolog, methyltransferase (yeast)
Stard4	1.56832	StAR-related lipid transfer (START) domain containing 4
Tef	1.56787	thyrotroph embryonic factor
1810058I24Rik	1.56771	RIKEN cDNA 1810058I24 gene
Zfp764	1.56647	zinc finger protein 764
Adamts3	1.566	a disintegrin-like and metallopeptidase (reprolysin type) with thrombospondin type 1 motif, 3
Fam55d	1.56541	family with sequence similarity 55, member D
Rdh11	1.5648	retinol dehydrogenase 11
Pstpip2	1.56447	proline-serine-threonine phosphatase-interacting protein 2
Rlf	1.56428	rearranged L-myc fusion sequence
Cd36	1.56329	CD36 antigen
Tmem87b	1.56039	transmembrane protein 87B
Slmap	1.56019	sarcolemma associated protein
Cd59a	1.56018	CD59a antigen
Scd2	1.55975	stearoyl-Coenzyme A desaturase 2
Pacsin1	1.55939	protein kinase C and casein kinase substrate in neurons 1
Il6ra	1.55892	interleukin 6 receptor, alpha
Sec62	1.55826	SEC62 homolog (S. cerevisiae)
Med28	1.55776	mediator of RNA polymerase II transcription, subunit 28 homolog (yeast)
Creb3	1.55719	cAMP responsive element binding protein 3
5033414D02Rik	1.55596	RIKEN cDNA 5033414D02 gene
Mkrn1	1.55589	makorin, ring finger protein, 1
Akr1c14	1.55575	aldo-keto reductase family 1, member C14
Nolc1	1.55476	nucleolar and coiled-body phosphoprotein 1
Tarsl2	1.55408	threonyl-tRNA synthetase-like 2
Atp6v0c	1.55359	ATPase, H+ transporting, lysosomal V0 subunit C
Ccndbp1	1.55339	cyclin D-type binding-protein 1
Crebl2	1.55199	cAMP responsive element binding protein-like 2
Usp32	1.55161	ubiquitin specific peptidase 32
Slc5a6	1.55137	solute carrier family 5 (sodium-dependent vitamin transporter), member 6
0610007C21Rik	1.54979	RIKEN cDNA 0610007C21 gene
Wisp2	1.54963	WNT1 inducible signaling pathway protein 2
Gne	1.54872	glucosamine
Derl1	1.54669	Der1-like domain family, member 1
Ralb	1.54613	v-ral simian leukemia viral oncogene homolog B (ras related)
Uchl5	1.54598	ubiquitin carboxyl-terminal esterase L5
Elovl1	1.54595	elongation of very long chain fatty acids (FEN1/Elo2, SUR4/Elo3, yeast)-like 1
Tex15	1.54542	testis expressed gene 15
Fam102a	1.54534	family with sequence similarity 102, member A
Pard6a	1.54495	par-6 (partitioning defective 6,) homolog alpha (C. elegans)
Ucp1	1.54481	uncoupling protein 1 (mitochondrial, proton carrier)
Rbm18	1.54477	RNA binding motif protein 18
Cybrd1	1.54415	cytochrome b reductase 1
Dynll2	1.54401	dynein light chain LC8-type 2
Hoxa5	1.54388	homeobox A5
Ccdc136	1.54353	coiled-coil domain containing 136
Sytl2	1.54329	synaptotagmin-like 2
St3gal5	1.54231	ST3 beta-galactoside alpha-2,3-sialyltransferase 5
Pstpip1	1.54217	proline-serine-threonine phosphatase-interacting protein 1
Ccdc28b	1.54171	coiled coil domain containing 28B
Slc2a3	1.54166	solute carrier family 2 (facilitated glucose transporter), member 3
Abcd2	1.54161	ATP-binding cassette, sub-family D (ALD), member 2
Sdhd	1.54141	succinate dehydrogenase complex, subunit D, integral membrane protein
Bmp2k	1.54077	BMP2 inducible kinase
Myf6	1.5402	myogenic factor 6
Car3	1.5389	carbonic anhydrase 3
Ncan	1.5389	neurocan
Prkag3	1.53807	protein kinase, AMP-activated, gamma 3 non-catatlytic subunit
Gpd1l	1.53677	glycerol-3-phosphate dehydrogenase 1-like
2210408K08Rik	1.53651	RIKEN cDNA 2210408K08 gene
Cyp4v3	1.53511	cytochrome P450, family 4, subfamily v, polypeptide 3
Traf6	1.53506	TNF receptor-associated factor 6
Txndc16	1.53456	thioredoxin domain containing 16
Cyb561d2	1.53308	cytochrome b-561 domain containing 2
Tmem177	1.53293	transmembrane protein 177
Clic5	1.53276	chloride intracellular channel 5
Cd82	1.53228	CD82 antigen
5430411K18Rik	1.53213	RIKEN cDNA 5430411K18 gene
Ldb2	1.53179	LIM domain binding 2
Nfkbie	1.53127	nuclear factor of kappa light polypeptide gene enhancer in B-cells inhibitor, epsilon
Fyb	1.53052	FYN binding protein
Dock9	1.52988	dedicator of cytokinesis 9
Ccnf	1.52825	cyclin F
AF251705	1.5266	cDNA sequence AF251705
Gpm6b	1.52656	glycoprotein m6b
Ldb3	1.52558	LIM domain binding 3
P2ry2	1.52541	purinergic receptor P2Y, G-protein coupled 2
Tgs1	1.52474	trimethylguanosine synthase homolog (S. cerevisiae)
Adamts15	1.52473	a disintegrin-like and metallopeptidase (reprolysin type) with thrombospondin type 1 motif, 15
Cib1	1.52448	calcium and integrin binding 1 (calmyrin)
Pm20d2	1.52424	peptidase M20 domain containing 2
Avl9	1.5237	AVL9 homolog (S. cerevisiase)
Cdc42	1.52272	cell division cycle 42 homolog (S. cerevisiae)
Cxcl13	1.52261	chemokine (C-X-C motif) ligand 13
Fxr1	1.52247	fragile X mental retardation gene 1, autosomal homolog
Isca1	1.52244	iron-sulfur cluster assembly 1 homolog (S. cerevisiae)
Lactb2	1.52114	lactamase, beta 2
Pnkd	1.52084	paroxysmal nonkinesiogenic dyskinesia
Sema3d	1.52037	sema domain, immunoglobulin domain (Ig), short basic domain, secreted, (semaphorin) 3D
Fam72a	1.5201	family with sequence similarity 72, member A
Actc1	1.5199	actin, alpha, cardiac muscle 1
Klhdc9 /// Pfdn2	1.51923	kelch domain containing 9 /// prefoldin 2
1700040I03Rik	1.51909	RIKEN cDNA 1700040I03 gene
Ufm1	1.51856	ubiquitin-fold modifier 1
A530017D24Rik /// LOC100504229	1.5181	RIKEN cDNA A530017D24 gene /// hypothetical LOC100504229
Ppp5c	1.51804	protein phosphatase 5, catalytic subunit
Ntm	1.51784	neurotrimin
Dusp2	1.51737	dual specificity phosphatase 2
Wdfy1	1.51726	WD repeat and FYVE domain containing 1
Nampt	1.51717	nicotinamide phosphoribosyltransferase
Csrp1	1.51669	cysteine and glycine-rich protein 1
Rnf11	1.51614	ring finger protein 11
Fxyd2	1.51538	FXYD domain-containing ion transport regulator 2
Stk11ip	1.51533	serine/threonine kinase 11 interacting protein
Fbxo33	1.51458	F-box protein 33
Cfl2	1.51428	cofilin 2, muscle
Slc16a7	1.51417	solute carrier family 16 (monocarboxylic acid transporters), member 7
Lbp	1.51412	lipopolysaccharide binding protein
Lmo2	1.51379	LIM domain only 2
Akr1b3	1.51371	aldo-keto reductase family 1, member B3 (aldose reductase)
Camk1d	1.5128	calcium/calmodulin-dependent protein kinase ID
Prpf31	1.51191	PRP31 pre-mRNA processing factor 31 homolog (yeast)
Fbxo9	1.51162	f-box protein 9
Lefty1	1.51156	left right determination factor 1
BC024814	1.51155	cDNA sequence BC024814
Pank1	1.51125	pantothenate kinase 1
Gpt2	1.50993	glutamic pyruvate transaminase (alanine aminotransferase) 2
Cep70	1.50987	centrosomal protein 70
Mul1	1.50926	mitochondrial ubiquitin ligase activator of NFKB 1
Tex2	1.50868	testis expressed gene 2
Dclk1	1.50775	doublecortin-like kinase 1
Alpk3	1.5071	alpha-kinase 3
Panx1	1.50708	pannexin 1
6530401D17Rik	1.5065	RIKEN cDNA 6530401D17 gene
Tmem9b	1.50571	TMEM9 domain family, member B
Hmgcl	1.50545	3-hydroxy-3-methylglutaryl-Coenzyme A lyase
Slc7a2	1.50544	solute carrier family 7 (cationic amino acid transporter, y+ system), member 2
Cyp51	1.50494	cytochrome P450, family 51
Phf20l1	1.50484	PHD finger protein 20-like 1
Chrnb1	1.50479	cholinergic receptor, nicotinic, beta polypeptide 1 (muscle)
Herc6	1.50432	hect domain and RLD 6
Pfkfb3	1.50406	6-phosphofructo-2-kinase/fructose-2,6-biphosphatase 3
Smyd1	1.50401	SET and MYND domain containing 1
Exoc6	1.50397	exocyst complex component 6
Armcx3	1.50381	armadillo repeat containing, X-linked 3
Echdc1	1.50269	enoyl Coenzyme A hydratase domain containing 1
Tmem147	1.5024	transmembrane protein 147
Cidec	1.50236	cell death-inducing DFFA-like effector c
Galm	1.50191	galactose mutarotase
Dgat2	1.50136	diacylglycerol O-acyltransferase 2
Gyk	1.50125	glycerol kinase
Taf7	1.50095	TAF7 RNA polymerase II, TATA box binding protein (TBP)-associated factor
Pdcd2	1.50073	programmed cell death 2
Adh7	1.50072	alcohol dehydrogenase 7 (class IV), mu or sigma polypeptide
Tmod2	1.50067	tropomodulin 2
Scly	1.50047	selenocysteine lyase
